# Supplementary material
Source: ML conference proceedings conference paper supplement (https://openreview.net/forum?id=tNE0Y3S4fE)
Supplement: supplementary_material [file attachment]

Table 5: Evaluation for generative models: ImageNet-1-mode, ImageNet-2-modes, ImageNet-5-modes, and ImageNet-10-modes.

| Model | ImageNet-1-mode | ImageNet-2-modes | ImageNet-5-modes | ImageNet-10-modes |
|-------|-----------------|------------------|------------------|-------------------|
| FID   | 58.30           | 57.34            | 57.78            | 57.26             |
| AFD   | 0               | 8.14             | 12.84            | 14.47             |

## A AFD VALIDATION

In this section, we thoroughly validate the effectiveness of our proposed metric, AFD, for measuring conditional diversity and demonstrate its role as a complementary metric to FID. In unconditional generation scenarios, the FID is widely used to evaluate the diversity of generated images. While low FID scores generally indicate high diversity across the entire dataset, they do not necessarily imply high conditional diversity. For instance, we observed that samples generated by the DDBM model often lack diversity when conditioned on edge images, despite achieving very low FID scores. To address this limitation, we introduce the concept of conditional diversity and propose a corresponding metric to quantify it.

The first question is why FID failed to measure the conditional diversity. To illustrate the limitations of FID in capturing conditional diversity, consider an extreme case: if the images generated by a generative model are identical to a set of baseline images, the FID score can be very low since the two distributions are indistinguishable. However, this scenario does not reflect diversity within the conditional outputs.

To further support our point, we designed two classes of pseudo-generative models capable of controlling the diversity of the generated images, which are further validated by FID and AFD. The experiments are evaluated on Imagenet dataset (Deng et al., 2009).

### A.1 PSEUDO-GENERATIVE MODELS BY RANDOM SELECTION

We designed four pseudo-generative models: ImageNet-1-mode, ImageNet-2-modes, ImageNet-5-modes, and ImageNet-10-modes. The experimental setup is as follows:

- We selected 11,000 samples from the ImageNet validation dataset, randomly choosing 11 images per class.
- From these, we designated 1,000 images as the "real" set, while the remaining images served as the source pool for the generative models.
- Each ImageNet- $k$ -modes model simulates a generative process by randomly sampling images from a pool of  $k$  distinct images within a given class.

We present sampled images in Fig. 6, where it is evident that the ImageNet-10-modes model generates images with the highest conditional diversity. To quantify this, we conducted experiments to calculate both FID and AFD for the four generative models. The results are summarized in Table 5. While the FID scores are nearly identical across all models, the AFD values increase as the conditional diversity of the generative models improves. This highlights that AFD is a more effective metric for capturing conditional diversity than FID.

### A.2 PSEUDO-GENERATIVE MODELS BY STRONG AUGMENTATION

Strong augmentation has been widely used in computer vision to generate synthetic data while preserving its underlying semantics (Chen et al., 2020; Zbontar et al., 2021; Sohn et al., 2020; Berthelot et al., 2019). The intensity of augmentation can be adjusted, with higher intensities producing more diverse images. To further validate our proposed metric, AFD, as a measure of diversity, we construct pseudo-generative models using strong augmentation.

We selected 1,000 images from the ImageNet-1k dataset, one from each category. These images were subjected to data augmentation, specifically using ColorJitter, with varying magnitudes to enhance diversity. For each image, the augmentation was applied 16 times, creating an augmented

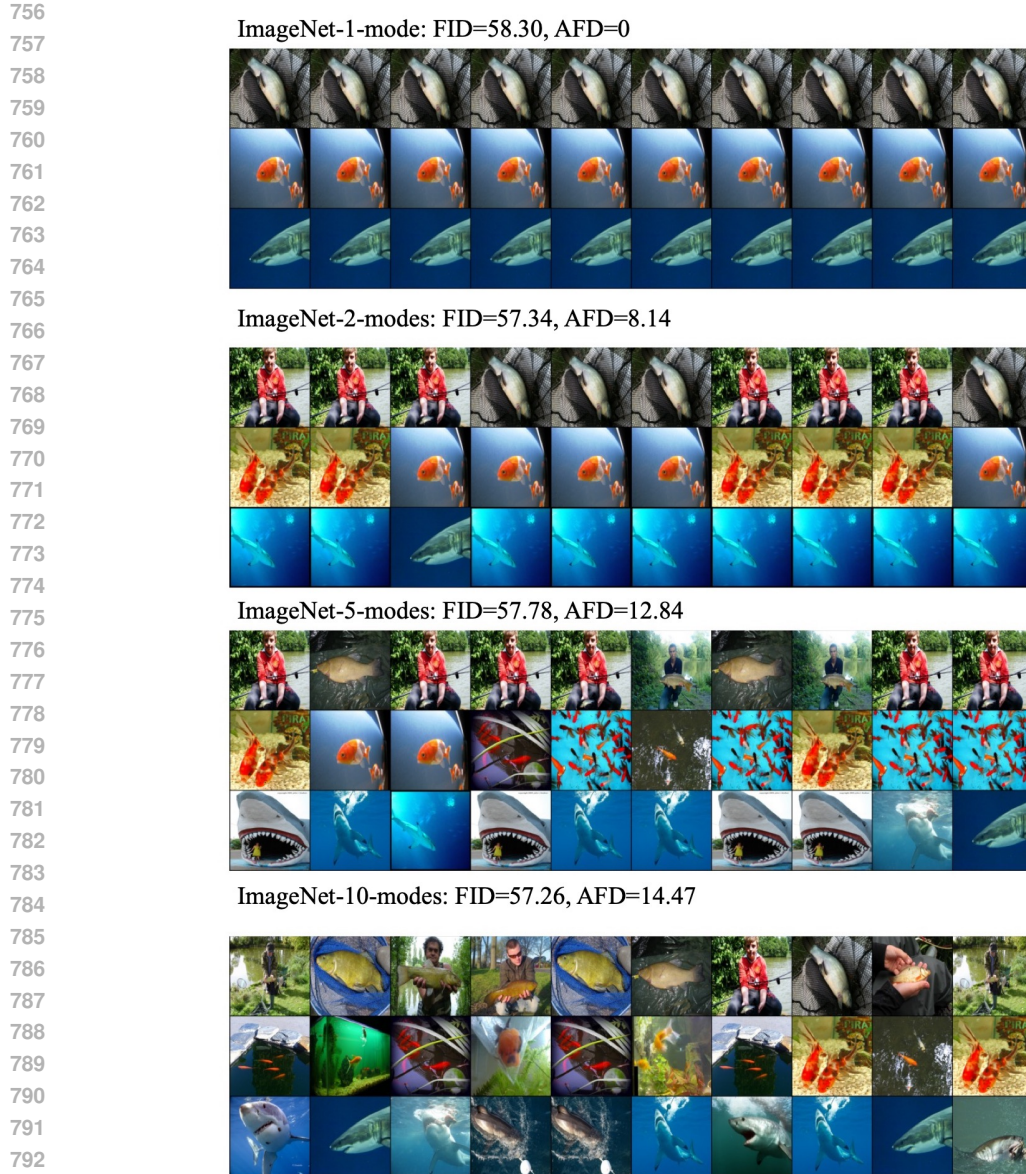

794 Figure 6: Sampled images from 4 generative models: ImageNet-1-mode, ImageNet-2-modes,  
795 ImageNet-5-modes, ImageNet-10-modes.  
796

797 Table 6: AFD results across different augmentation magnitudes  
798

| Augmentation magnitude | 0.1  | 0.2  | 0.3  | 0.4   | 0.5   | 0.6   | 0.7   | 0.8   |
|------------------------|------|------|------|-------|-------|-------|-------|-------|
| AFD                    | 2.16 | 3.77 | 5.13 | 6.16  | 6.98  | 7.63  | 8.22  | 9.01  |
| FID                    | 0.20 | 2.95 | 7.02 | 11.62 | 16.33 | 20.84 | 25.12 | 28.89 |

803  
804  
805 dataset for each magnitude setting. We then calculated the AFD for these augmented datasets to  
806 evaluate the relationship between dataset diversity (as influenced by augmentation magnitude) and  
807 the AFD value.

808 Table 6 summarizes the AFD results across various augmentation magnitude settings. The results  
809 show that as diversity increases, AFD values also rise, further confirming that the proposed AFD  
metric is a reliable indicator of image diversity.

## B PROOFS

There are infinitely many pinned processes characterized by the Gaussian transition kernel  $p_{t|0,T}(\mathbf{x}_t | \mathbf{x}_0, \mathbf{x}_T) = \mathcal{N}(\mathbf{x}_t; \alpha_t \mathbf{x}_0 + \beta_t \mathbf{x}_T, \gamma_t^2 \mathbf{I})$ . Specifically, we formalize the pinned process as a linear Itô SDE, as presented in Lemma 3.

**Lemma 3.** *There exist a linear Itô SDE*

$$d\mathbf{X}_t = [f_t \mathbf{X}_t + s_t \mathbf{x}_T] dt + g_t d\mathbf{W}_t, \quad \mathbf{X}_0 = \mathbf{x}_0, \quad (18)$$

where  $f_t = \frac{\dot{\alpha}_t}{\alpha_t}$ ,  $s_t = \dot{\beta}_t - \frac{\dot{\alpha}_t}{\alpha_t} \beta_t$ ,  $g_t = \sqrt{2(\gamma_t \dot{\gamma}_t - \frac{\dot{\alpha}_t}{\alpha_t} \gamma_t^2)}$ , that has a Gaussian marginal distribution  $\mathcal{N}(\mathbf{x}_t; \alpha_t \mathbf{x}_0 + \beta_t \mathbf{x}_T, \gamma_t^2 \mathbf{I})$ .

Given the pinned process (18), we can sample from the conditional distribution  $p_{0|T}(\mathbf{x}_0 | \mathbf{x}_T)$  by solving the reverse SDE or ODE from  $t = T$  to  $t = 0$ :

$$d\mathbf{X}_t = [f_t \mathbf{X}_t + s_t \mathbf{x}_T - g_t^2 \nabla_{\mathbf{x}_t} \log p_t(\mathbf{X}_t | \mathbf{x}_T)] dt + g_t d\mathbf{W}_t, \quad \mathbf{X}_T = \mathbf{x}_T, \quad (19)$$

$$d\mathbf{X}_t = \left[ f_t \mathbf{X}_t + s_t \mathbf{x}_T - \frac{1}{2} g_t^2 \nabla_{\mathbf{x}_t} \log p_t(\mathbf{X}_t | \mathbf{x}_T) \right] dt \quad \mathbf{X}_T = \mathbf{x}_T, \quad (20)$$

where the score  $\nabla_{\mathbf{x}_t} \log p_t(\mathbf{X}_t | \mathbf{x}_T)$  can be estimated by score matching objective (8). To improve training stability, we introduced score reparameterization in Sec. 4.1.

**Lemma 1.** *There exist a linear Itô SDE*

$$d\mathbf{X}_t = [f_t \mathbf{X}_t + s_t \mathbf{x}_T] dt + g_t d\mathbf{W}_t, \quad \mathbf{X}_0 = \mathbf{x}_0, \quad (21)$$

where  $f_t = \frac{\dot{\alpha}_t}{\alpha_t}$ ,  $s_t = \dot{\beta}_t - \frac{\dot{\alpha}_t}{\alpha_t} \beta_t$ ,  $g_t = \sqrt{2(\gamma_t \dot{\gamma}_t - \frac{\dot{\alpha}_t}{\alpha_t} \gamma_t^2)}$ , that has a Gaussian marginal distribution  $\mathcal{N}(\mathbf{x}_t; \alpha_t \mathbf{x}_0 + \beta_t \mathbf{x}_T, \gamma_t^2 \mathbf{I})$ .

*Proof.* Let  $\mathbf{m}_t$  denote the mean function of the given Itô SDE, then we have  $\frac{d\mathbf{m}_t}{dt} = f_t \mathbf{m}_t + s_t \mathbf{x}_T$ . Given the transition kernel, the mean function  $\mathbf{m}_t = \alpha_t \mathbf{x}_0 + \beta_t \mathbf{x}_T$ , therefore,

$$\dot{\alpha}_t \mathbf{x}_0 + \dot{\beta}_t \mathbf{x}_T = f_t (\alpha_t \mathbf{x}_0 + \beta_t \mathbf{x}_T) + s_t \mathbf{x}_T. \quad (22)$$

Matching the above equation:

$$f_t = \frac{\dot{\alpha}_t}{\alpha_t}, \quad s_t = \dot{\beta}_t - \beta_t \frac{\dot{\alpha}_t}{\alpha_t}. \quad (23)$$

Further, For the variance  $\gamma_t^2$  of the process, the dynamics are given by:

$$\frac{d\gamma_t^2}{dt} = 2f_t \gamma_t^2 + g_t^2. \quad (24)$$

Solving for  $g_t^2$ , we substitute  $f_t = \frac{\dot{\alpha}_t}{\alpha_t}$ :

$$g_t^2 = \frac{d\gamma_t^2}{dt} - 2 \frac{\dot{\alpha}_t}{\alpha_t} \gamma_t^2 \quad (25)$$

Therefore,

$$g_t = \sqrt{2(\gamma_t \dot{\gamma}_t - \frac{\dot{\alpha}_t}{\alpha_t} \gamma_t^2)}. \quad (26)$$

□

For dynamics described by ODE  $d\mathbf{X}_t = \mathbf{u}_t dt$ , we can identify the entire class of SDEs that maintain the same marginal distributions, as detailed in Lemma 2. This enables us to control the stochasticity during sampling by appropriately designing  $\epsilon_t$ .

**Lemma 2.** Consider a continuous dynamics given by ODE of the form:  $d\mathbf{X}_t = \mathbf{u}_t dt$ , with the density evolution  $p_t(\mathbf{X}_t)$ . Then there exists forward SDEs and backward SDEs that match the marginal distribution  $p_t$ . The forward SDEs are given by:  $d\mathbf{X}_t = (\mathbf{u}_t + \epsilon_t \nabla \log p_t) dt + \sqrt{2\epsilon_t} d\mathbf{W}_t, \epsilon_t > 0$ . The backward SDEs are given by:  $d\mathbf{X}_t = (\mathbf{u}_t - \epsilon_t \nabla \log p_t) dt + \sqrt{2\epsilon_t} d\mathbf{W}_t, \epsilon_t > 0$ .

*Proof.* For the forward SDEs, the Fokker-Planck equations are given by:

$$\frac{\partial p_t(\mathbf{X}_t)}{\partial t} = -\nabla \cdot [(\mathbf{u}_t + \epsilon_t \nabla \log p_t) p_t(\mathbf{X}_t)] + \epsilon_t \nabla^2 p_t(\mathbf{X}_t) \quad (27)$$

$$= -\nabla \cdot [\mathbf{u}_t p_t(\mathbf{X}_t)] - \nabla \cdot [\epsilon_t (\nabla \log p_t) p_t(\mathbf{X}_t)] + \epsilon_t \nabla^2 p_t(\mathbf{X}_t) \quad (28)$$

$$= -\nabla \cdot [\mathbf{u}_t p_t(\mathbf{X}_t)] - \epsilon_t \nabla \cdot [\nabla p_t(\mathbf{X}_t)] + \epsilon_t \nabla^2 p_t(\mathbf{X}_t) \quad (29)$$

$$= -\nabla \cdot [\mathbf{u}_t p_t(\mathbf{X}_t)]. \quad (30)$$

This is exactly the Fokker-Planck equation for the original deterministic ODE  $d\mathbf{X}_t = \mathbf{u}_t dt$ . Therefore, the forward SDE maintains the same marginal distribution  $p_t(\mathbf{X}_t)$  as the original ODE.

Now consider the backward SDEs, the Fokker-Planck equations become:

$$\frac{\partial p_t(\mathbf{X}_t)}{\partial t} = -\nabla \cdot [(\mathbf{u}_t - \epsilon_t \nabla \log p_t) p_t(\mathbf{X}_t)] - \epsilon_t \nabla^2 p_t(\mathbf{X}_t) \quad (31)$$

$$= -\nabla \cdot [\mathbf{u}_t p_t(\mathbf{X}_t)] + \nabla \cdot [\epsilon_t (\nabla \log p_t) p_t(\mathbf{X}_t)] - \epsilon_t \nabla^2 p_t(\mathbf{X}_t) \quad (32)$$

$$= -\nabla \cdot [\mathbf{u}_t p_t(\mathbf{X}_t)]. \quad (33)$$

This is again the Fokker-Planck equation corresponding to the original deterministic ODE  $d\mathbf{X}_t = \mathbf{u}_t dt$ . Therefore, the backward SDE also maintains the same marginal distribution  $p_t(\mathbf{X}_t)$ .  $\square$

**Theorem 3.** Suppose the transition kernel of a diffusion process is given by  $p_{t|0,T}(\mathbf{x}_t | \mathbf{x}_0, \mathbf{x}_T) = \mathcal{N}(\mathbf{x}_t; \alpha_t \mathbf{x}_0 + \beta_t \mathbf{x}_T, \gamma_t^2 \mathbf{I})$ , then the evolution of conditional probability  $q(\mathbf{X}_t | \mathbf{x}_T)$  has a class of time reverse sampling SDEs of the form:

$$d\mathbf{X}_t = \left[ \dot{\alpha}_t \hat{\mathbf{x}}_0 + \dot{\beta}_t \mathbf{x}_T - (\dot{\gamma}_t \gamma_t + \epsilon_t) \nabla_{\mathbf{x}_t} \log p_t(\mathbf{X}_t | \mathbf{x}_T) \right] dt + \sqrt{2\epsilon_t} d\mathbf{W}_t \quad \mathbf{X}_T = \mathbf{x}_T. \quad (34)$$

*Proof.* Recall Eqs. (19) 20 and Lemma 2,

$$d\mathbf{X}_t = \left[ \frac{\dot{\alpha}_t}{\alpha_t} \mathbf{x}_t + \left( \dot{\beta}_t - \frac{\dot{\alpha}_t}{\alpha_t} \beta_t \right) \mathbf{x}_T - \left( \gamma_t \dot{\gamma}_t - \frac{\dot{\alpha}_t}{\alpha_t} \gamma_t^2 + \epsilon_t \right) \nabla_{\mathbf{x}_t} \log p_t(\mathbf{x}_t | \mathbf{x}_T) \right] dt + \sqrt{2\epsilon_t} d\mathbf{w}_t. \quad (35)$$

$\square$

Next we take the reparameterized score 12 into 35:

$$d\mathbf{X}_t = \left[ \frac{\dot{\alpha}_t}{\alpha_t} \mathbf{X}_t + \left( \dot{\beta}_t - \frac{\dot{\alpha}_t}{\alpha_t} \beta_t \right) \mathbf{x}_T - \left( \gamma_t \dot{\gamma}_t - \frac{\dot{\alpha}_t}{\alpha_t} \gamma_t^2 + \epsilon_t \right) \frac{\alpha_t \hat{\mathbf{x}}_0 + \beta_t \mathbf{x}_T - \mathbf{X}_t}{\gamma_t^2} \right] dt + \sqrt{2\epsilon_t} d\mathbf{w}_t \quad (36)$$

$$= \left[ \dot{\alpha}_t \hat{\mathbf{x}}_0 + \dot{\beta}_t \mathbf{x}_T - \left( \gamma_t \dot{\gamma}_t + \epsilon_t \right) \frac{\alpha_t \hat{\mathbf{x}}_0 + \beta_t \mathbf{x}_T - \mathbf{X}_t}{\gamma_t^2} \right] dt + \sqrt{2\epsilon_t} d\mathbf{w}_t \quad (37)$$

$$= \left[ \dot{\alpha}_t \hat{\mathbf{x}}_0 + \dot{\beta}_t \mathbf{x}_T - \left( \dot{\gamma}_t + \frac{\epsilon_t}{\gamma_t} \right) \frac{\alpha_t \hat{\mathbf{x}}_0 + \beta_t \mathbf{x}_T - \mathbf{X}_t}{\gamma_t} \right] dt + \sqrt{2\epsilon_t} d\mathbf{w}_t \quad (38)$$

$$= \left[ \dot{\alpha}_t \hat{\mathbf{x}}_0 + \dot{\beta}_t \mathbf{x}_T - \left( \dot{\gamma}_t + \frac{\epsilon_t}{\gamma_t} \right) \hat{\mathbf{z}} \right] dt + \sqrt{2\epsilon_t} d\mathbf{w}_t. \quad (39)$$

**Theorem 4.** Let  $(\mathbf{x}_0, \mathbf{x}_T) \sim \pi_0(\mathbf{x}_0, \mathbf{x}_T)$ ,  $\mathbf{x}_t \sim p_t(\mathbf{x}|\mathbf{x}_0, \mathbf{x}_T)$ , Given the transition kernel:  $p(\mathbf{x}_t | \mathbf{x}_0, \mathbf{x}_T) = \mathcal{N}(\mathbf{x}_t; \alpha_t \mathbf{x}_0 + \beta_t \mathbf{x}_T, \gamma_t^2 \mathbf{I})$ , if  $\hat{\mathbf{x}}_0(\mathbf{x}_t, \mathbf{x}_T, t)$  is a denoiser function that minimizes the expected  $L_2$  denoising error for samples drawn from  $\pi_0(\mathbf{x}_0, \mathbf{x}_T)$ :

$$\hat{\mathbf{x}}_0(\mathbf{x}_t, \mathbf{x}_T, t) = \arg \min_{D(\mathbf{x}_t, \mathbf{x}_T, t)} \mathbb{E}_{\mathbf{x}_0, \mathbf{x}_T, \mathbf{x}_t} [\lambda(t) \|D(\mathbf{x}_t, \mathbf{x}_T, t) - \mathbf{x}_0\|_2^2], \quad (40)$$

then the score has the following relationship with  $\hat{\mathbf{x}}_0(\mathbf{x}_t, \mathbf{x}_T, t)$ :

$$\nabla_{\mathbf{x}_t} \log p_t(\mathbf{x}_t | \mathbf{x}_T) = \frac{\alpha_t \hat{\mathbf{x}}_0(\mathbf{x}_t, \mathbf{x}_T, t) + \beta_t \mathbf{x}_T - \mathbf{x}_t}{\gamma_t^2}. \quad (41)$$

*Proof.*

$$\mathcal{L}(D) = \mathbb{E}_{(\mathbf{x}_0, \mathbf{x}_T) \sim \pi_0(\mathbf{x}_0, \mathbf{x}_T)} \mathbb{E}_{\mathbf{x}_t \sim p_t(\mathbf{x}_t | \mathbf{x}_0, \mathbf{x}_T)} \|D(\mathbf{x}_t) - \mathbf{x}_0\|_2^2 \quad (42)$$

$$= \int_{\mathbb{R}^d} \int_{\mathbb{R}^d} \underbrace{\int_{\mathbb{R}^d} p_t(\mathbf{x}_t | \mathbf{x}_0, \mathbf{x}_T) \pi_0(\mathbf{x}_0, \mathbf{x}_T) \|D(\mathbf{x}_t) - \mathbf{x}_0\|_2^2 d\mathbf{x}_0 d\mathbf{x}_T d\mathbf{x}_t}_{=: \mathcal{L}(D; \mathbf{x}_t, \mathbf{x}_T)} \quad (43)$$

$$\mathcal{L}(D; \mathbf{x}_t, \mathbf{x}_T) = \int_{\mathbb{R}^d} p_t(\mathbf{x}_t | \mathbf{x}_0, \mathbf{x}_T) \pi_0(\mathbf{x}_0, \mathbf{x}_T) \|D(\mathbf{x}_t) - \mathbf{x}_0\|_2^2 d\mathbf{x}_0, \quad (44)$$

we can minimize  $\mathcal{L}(D)$  by minimizing  $\mathcal{L}(D; \mathbf{x}_t, \mathbf{x}_T)$  independently for each  $\{\mathbf{x}_t, \mathbf{x}_T\}$  pair.

$$D^*(\mathbf{x}_t, \mathbf{x}_T) = \arg \min_{D(\mathbf{x}_t)} \mathcal{L}(D; \mathbf{x}_t, \mathbf{x}_T) \quad (45)$$

$$\mathbf{0} = \nabla_{D(\mathbf{x}_t, \mathbf{x}_T)} [\mathcal{L}(D; \mathbf{x}_t, \mathbf{x}_T)] \quad (46)$$

$$= \int_{\mathbb{R}^d} p_t(\mathbf{x}_t | \mathbf{x}_0, \mathbf{x}_T) \pi_0(\mathbf{x}_0, \mathbf{x}_T) 2[D(\mathbf{x}_t) - \mathbf{x}_0] d\mathbf{x}_0 \quad (47)$$

$$= 2[D(\mathbf{x}_t, \mathbf{x}_T) \int_{\mathbb{R}^d} p_t(\mathbf{x}_t | \mathbf{x}_0, \mathbf{x}_T) \pi_0(\mathbf{x}_0, \mathbf{x}_T) d\mathbf{x}_0 - \int_{\mathbb{R}^d} p_t(\mathbf{x}_t | \mathbf{x}_0, \mathbf{x}_T) \pi_0(\mathbf{x}_0, \mathbf{x}_T) \mathbf{x}_0 d\mathbf{x}_0] \quad (48)$$

$$= 2[D(\mathbf{x}_t) p_t(\mathbf{x}_t, \mathbf{x}_T) - \int_{\mathbb{R}^d} p_t(\mathbf{x}_t | \mathbf{x}_0, \mathbf{x}_T) \pi_0(\mathbf{x}_0, \mathbf{x}_T) \mathbf{x}_0 d\mathbf{x}_0], \quad (49)$$

$$D^*(\mathbf{x}_t, \mathbf{x}_T) = \int_{\mathbb{R}^d} \frac{p_t(\mathbf{x}_t | \mathbf{x}_0, \mathbf{x}_T) \pi_0(\mathbf{x}_0, \mathbf{x}_T) \mathbf{x}_0}{p_t(\mathbf{x}_t, \mathbf{x}_T)} d\mathbf{x}_0, \quad (50)$$

$$\nabla_{\mathbf{x}_t} \log p_t(\mathbf{x}_t | \mathbf{x}_T) = \frac{\nabla_{\mathbf{x}_t} p_t(\mathbf{x}_t, \mathbf{x}_T)}{p_t(\mathbf{x}_t, \mathbf{x}_T)} \quad (51)$$

$$= \frac{\int \nabla_{\mathbf{x}_t} p_t(\mathbf{x}_t | \mathbf{x}_T, \mathbf{x}_0) \pi_0(\mathbf{x}_0, \mathbf{x}_T) d\mathbf{x}_0}{p_t(\mathbf{x}_t, \mathbf{x}_T)} \quad (52)$$

$$= - \int \frac{\mathbf{x}_t - \alpha_t \mathbf{x}_0 - \beta_t \mathbf{x}_T}{\gamma_t^2} \frac{p_t(\mathbf{x}_t | \mathbf{x}_0, \mathbf{x}_T) \pi_0(\mathbf{x}_0, \mathbf{x}_T)}{p_t(\mathbf{x}_t, \mathbf{x}_T)} d\mathbf{x}_0 \quad (53)$$

$$= \frac{\alpha_t D^*(\mathbf{x}_t, \mathbf{x}_T) + \beta_t \mathbf{x}_T - \mathbf{x}_t}{\gamma_t^2}. \quad (54)$$

Thus we conclude the proof.  $\square$

## C REFRAMING PREVIOUS METHODS IN OUR FRAMEWORK

We draw a link between our framework and the diffusion bridge models used in DDBM.

### C.1 DDBM-VE

DDBM-VE can be reformulated in our framework as we set :

$$\alpha_t = s_t \left(1 - \frac{\sigma_t^2}{\sigma_T^2}\right), \beta_t = \frac{s_t \sigma_t^2}{s_1 \sigma_T^2}, \gamma_t = \sigma_t s_t \sqrt{\left(1 - \frac{\sigma_t^2}{\sigma_T^2}\right)} \quad (55)$$

*Proof.* In the origin DDBM paper, the evolution of conditional probability  $q(\mathbf{x}_t | \mathbf{x}_T)$  has a time reversed SDE of the form:

$$d\mathbf{X}_t = [\bar{\mathbf{f}}_t(\mathbf{X}_t) - \bar{g}_t^2 \bar{\mathbf{h}}_t(\mathbf{X}_t) - \bar{g}_t^2 \mathbf{s}_t(\mathbf{X}_t)] dt + \bar{g}_t d\hat{\mathbf{W}}_t, \quad (56)$$

and an associated probability flow ODE

$$d\mathbf{X}_t = \left[ \bar{\mathbf{f}}_t(\mathbf{X}_t) - \bar{g}_t^2 \bar{\mathbf{h}}_t(\mathbf{X}_t) - \frac{1}{2} \bar{g}_t^2 \mathbf{s}_t(\mathbf{X}_t) \right] dt. \quad (57)$$

Compare Eqs. (56) and 57 with Lemma 3. We only need to prove:

$$\bar{\mathbf{f}}_t(\mathbf{X}_t) - \bar{g}_t^2 \bar{\mathbf{h}}_t(\mathbf{X}_t) = f_t \mathbf{X}_t + s_t \mathbf{x}_T, \bar{g}_t = g_t. \quad (58)$$

In the original paper,

$$\bar{\mathbf{f}}_t(\mathbf{X}_t) = 0, \bar{g}_t^2 = \frac{d}{dt} \sigma_t^2, \bar{\mathbf{h}}_t(\mathbf{X}_t) = \frac{\mathbf{x}_T - \mathbf{x}_t}{\sigma_T^2 - \sigma_t^2}. \quad (59)$$

Therefore,

$$\bar{\mathbf{f}}_t(\mathbf{X}_t) - \bar{g}_t^2 \bar{\mathbf{h}}_t(\mathbf{X}_t) = \frac{2\sigma_t \dot{\sigma}_t (\mathbf{x}_T - \mathbf{x}_t)}{\sigma_T^2 - \sigma_t^2}, \bar{g}_t^2 = 2\dot{\sigma}_t \sigma_t. \quad (60)$$

In our framework,  $f_t, s_t, g_t^2$  can be calculated:

$$f_t = \frac{\dot{\alpha}_t}{\alpha_t} = \frac{d}{dt} \log \alpha_t = \frac{d}{dt} \log \frac{\sigma_T^2 - \sigma_t^2}{\sigma_T^2} = \frac{-2\sigma_t \dot{\sigma}_t}{\sigma_T^2 - \sigma_t^2}, \quad (61)$$

$$s_t = \dot{\beta}_t - \frac{\dot{\alpha}_t}{\alpha_t} \beta_t = \frac{2\sigma_t \dot{\sigma}_t}{\sigma_T^2} + \frac{2\sigma_t \dot{\sigma}_t}{\sigma_T^2 - \sigma_t^2} \cdot \frac{\sigma_t^2}{\sigma_T^2} = \frac{2\sigma_t \dot{\sigma}_t}{\sigma_T^2 - \sigma_t^2}. \quad (62)$$

$$g_t^2 = 2(\gamma_t \dot{\gamma}_t - \frac{\dot{\alpha}_t}{\alpha_t} \gamma_t^2) = 2\gamma_t^2 \left( \frac{\dot{\gamma}_t}{\gamma_t} - \frac{\dot{\alpha}_t}{\alpha_t} \right) = \gamma_t^2 \left( \frac{(\sigma_T^2 - 2\sigma_t^2) \dot{\sigma}_t}{(\sigma_T^2 - \sigma_t^2) \sigma_t} + \frac{2\dot{\sigma}_t \sigma_t}{\sigma_T^2 - \sigma_t^2} \right) = 2\sigma_t \dot{\sigma}_t. \quad (63)$$

Therefore,

$$f_t \mathbf{X}_t + s_t \mathbf{x}_T = \frac{2\sigma_t \dot{\sigma}_t (\mathbf{x}_T - \mathbf{x}_t)}{\sigma_T^2 - \sigma_t^2} = \bar{\mathbf{f}}_t(\mathbf{X}_t) - \bar{g}_t^2 \bar{\mathbf{h}}_t(\mathbf{X}_t), \quad \bar{g}_t = g_t, \quad (64)$$

which matches the formulation in DDBM.

□

1026 C.2 DDBM-VP  
1027

1028 DDBM-VP can be reformulated in our framework as we set :  
1029

$$1030 \alpha_t = a_t \left(1 - \frac{\sigma_t^2 a_1^2}{\sigma_1^2 a_t^2}\right), \beta_t = \frac{\sigma_t^2 a_1}{\sigma_1^2 a_t}, \gamma_t = \sqrt{\sigma_t^2 \left(1 - \frac{\sigma_t^2 a_1^2}{\sigma_1^2 a_t^2}\right)}. \quad (65)$$

1033 *Proof.* In the original DDBM-VP setting,  
1034

$$1035 \bar{\mathbf{f}}_t(\mathbf{X}_t) = \frac{d \log a_t}{dt} \mathbf{x}_t, \quad (66)$$

$$1036 \bar{g}_t^2 = 2\sigma_t \dot{\sigma}_t - 2\frac{\dot{a}_t}{a_t} \sigma_t^2 = \frac{2\sigma_t \dot{\sigma}_t a_t - 2\sigma_t^2 \dot{a}_t}{a_t}, \quad (67)$$

$$1037 \bar{\mathbf{h}}_t(\mathbf{X}_t) = \frac{(a_t/a_1)\mathbf{x}_T - \mathbf{x}_t}{\sigma_t^2(\text{SNR}_t/\text{SNR}_1 - 1)} = \frac{a_1 a_t \mathbf{x}_T - a_1^2 \mathbf{x}_t}{\sigma_1^2 a_t^2 - \sigma_t^2 a_1^2}. \quad (68)$$

1044 Therefore,  
1045

$$1046 \bar{\mathbf{f}}_t(\mathbf{X}_t) - \bar{g}_t^2 \bar{\mathbf{h}}_t(\mathbf{X}_t) = \left[ \frac{\dot{a}_t}{a_t} - \frac{2\sigma_t a_1^2 (\dot{\sigma}_t a_t - \sigma_t \dot{a}_t)}{a_t (\sigma_1^2 a_t^2 - \sigma_t^2 a_1^2)} \right] \mathbf{x}_t + \frac{2\sigma_t a_1 (\dot{\sigma}_t a_t - \sigma_t \dot{a}_t)}{\sigma_1^2 a_t^2 - \sigma_t^2 a_1^2} \mathbf{x}_T. \quad (69)$$

1049 In our framework,  $f_t, s_t, g_t^2$  can be calculated:  
1050

$$1051 f_t = \frac{\dot{\alpha}_t}{\alpha_t} = \frac{d}{dt} \log \alpha_t \quad (70)$$

$$1052 = \frac{d}{dt} \log \frac{\sigma_1^2 a_t^2 - \sigma_t^2 a_1^2}{\sigma_1^2 a_t} \quad (71)$$

$$1053 = \frac{2\sigma_1^2 a_t \dot{a}_t - 2a_1^2 \sigma_t \dot{\sigma}_t}{\sigma_1^2 a_t^2 - \sigma_t^2 a_1^2} - \frac{\dot{a}_t}{a_t} \quad (72)$$

$$1054 = \frac{\dot{a}_t}{a_t} - \frac{2a_1^2 \sigma_t (a_t \dot{\sigma}_t - \dot{a}_t \sigma_t)}{a_t (\sigma_1^2 a_t^2 - \sigma_t^2 a_1^2)}, \quad (73)$$

$$1055 s_t = \dot{\beta}_t - \frac{\dot{\alpha}_t}{\alpha_t} \beta_t = \beta_t \left( \frac{\dot{\beta}_t}{\beta_t} - \frac{\dot{\alpha}_t}{\alpha_t} \right) \quad (74)$$

$$1056 = \frac{\sigma_t^2 a_1}{\sigma_1^2 a_t} \left( \frac{2\dot{\sigma}_t}{\sigma_t} - \frac{2\sigma_1^2 a_t \dot{a}_t - 2a_1^2 \sigma_t \dot{\sigma}_t}{\sigma_1^2 a_t^2 - \sigma_t^2 a_1^2} \right) \quad (75)$$

$$1057 = \frac{2\sigma_t a_1 (\dot{\sigma}_t a_t - \sigma_t \dot{a}_t)}{\sigma_1^2 a_t^2 - \sigma_t^2 a_1^2}, \quad (76)$$

$$1058 g_t^2 = \gamma_t \dot{\gamma}_t - \frac{\dot{\alpha}_t}{\alpha_t} \gamma_t^2 = \gamma_t^2 \left( \frac{\dot{\gamma}_t}{\gamma_t} - \frac{\dot{\alpha}_t}{\alpha_t} \right) \quad (77)$$

$$1059 = \gamma_t^2 \frac{d}{dt} \log \frac{\gamma_t}{\alpha_t} \quad (78)$$

$$1060 = \gamma_t^2 \frac{d}{dt} \left( \frac{1}{2} \log \frac{\sigma_t^2 \sigma_1^2}{\sigma_1^2 a_t^2 - \sigma_t^2 a_1^2} \right) \quad (79)$$

$$1061 = \sigma_t^2 \left( 1 - \frac{\sigma_t^2 a_1^2}{\sigma_1^2 a_t^2} \right) \left( \frac{\dot{\sigma}_t}{\sigma_t} - \frac{\sigma_1^2 a_t \dot{a}_t - a_1^2 \sigma_t \dot{\sigma}_t}{\sigma_1^2 a_t^2 - \sigma_t^2 a_1^2} \right) \quad (80)$$

$$1062 = \frac{\dot{\sigma}_t \sigma_t a_t - \sigma_t^2 \dot{a}_t}{a_t}. \quad (81)$$

1080 Therefore,  
1081

$$1082 f_t \mathbf{X}_t + s_t \mathbf{x}_T = \bar{\mathbf{f}}_t(\mathbf{X}_t) - \bar{g}_t^2 \bar{\mathbf{h}}_t(\mathbf{X}_t), \bar{g}_t = g_t, \quad (82)$$

1083 which matches the formulation in DDBM.  
1084  
1085  
1086  
1087  $\square$   
1088

### 1089 C.3 EDM

1090 **ODE formulation.** The ODE formulation in EDM can be formulated in our framework as we set  
1091  $\alpha_t = 1, \beta_t = 0, \gamma_t = \sigma_t$ .  
1092

1093 *Proof.* Recall 20, the ODE formulation is given by:  
1094

$$1095 d\mathbf{X}_t = \left[ f_t \mathbf{X}_t + s_t \mathbf{x}_T - \frac{1}{2} g_t^2 \nabla_{\mathbf{x}_t} \log p_t(\mathbf{X}_t | \mathbf{x}_T) \right] dt \quad \mathbf{X}_T = \mathbf{x}_T \quad (83)$$

1096 where  $f_t = \frac{\dot{\alpha}_t}{\alpha_t}$ ,  $s_t = \dot{\beta}_t - \frac{\dot{\alpha}_t}{\alpha_t} \beta_t$ ,  $g_t = \sqrt{2(\gamma_t \dot{\gamma}_t - \frac{\dot{\alpha}_t}{\alpha_t} \gamma_t^2)}$ . As  $\alpha_t = 1, \beta_t = 0, \gamma_t = \sigma_t$ , The  
1097 sampling ODE is given by:  
1098

$$1099 d\mathbf{X}_t = -\sigma_t \dot{\sigma}_t \nabla_{\mathbf{x}_t} \log p_t(\mathbf{X}_t) dt \quad (84)$$

1100  $\square$   
1101

1102 **Denoising score matching.** The score reparameterization in EDM is the same as ours in Eq. 12.  
1103 Let  $\alpha_t = 1, \beta_t = 0, \gamma_t = \sigma_t$ , then the score reparameterization in Eq. 12 is given by:  
1104

$$1105 \nabla_{\mathbf{x}_t} \log p_t(\mathbf{X}_t) \approx \frac{\hat{\mathbf{x}}_0 - \mathbf{x}_t}{\sigma_t^2}. \quad (85)$$

1106 **Sampling SDEs with stochasticity added.** Recall Theorem 1, as  $\alpha_t = 1, \beta_t = 0, \gamma_t = \sigma_t$ , then the  
1107 SDE has the form:  
1108

$$1109 d\mathbf{X}_t = (-\sigma_t \dot{\sigma}_t + \epsilon_t) \nabla_{\mathbf{x}_t} \log p_t(\mathbf{X}_t) dt + \sqrt{2\epsilon_t} d\mathbf{W}_t. \quad (86)$$

1110 Now we recover the stochastic sampling SDE in original EDM paper.  
1111

### 1112 C.4 I2SB

1113 I2SB can be reformulated in our framework as we let:  
1114

$$1115 \alpha_t = 1 - \frac{\sigma_t^2}{\sigma_1^2}, \beta_t = \frac{\sigma_t^2}{\sigma_1^2}, \gamma_t = \sqrt{\sigma_t^2 \left(1 - \frac{\sigma_t^2}{\sigma_1^2}\right)} \quad (87)$$

1116 where  $\sigma_t^2 := \int_0^t \beta_\tau d\tau$ .  
1117

1118 Using discretization 17:  
1119



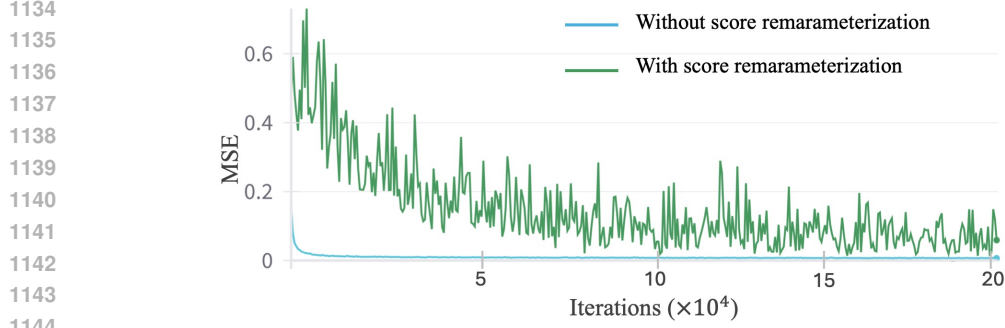

1145  
1146  
1147  
Figure 7: MSEs during training, where  $\text{MSE} = \frac{1}{B} \sum_{i=1}^B \|\hat{x}_0 - x_0\|^2$ .

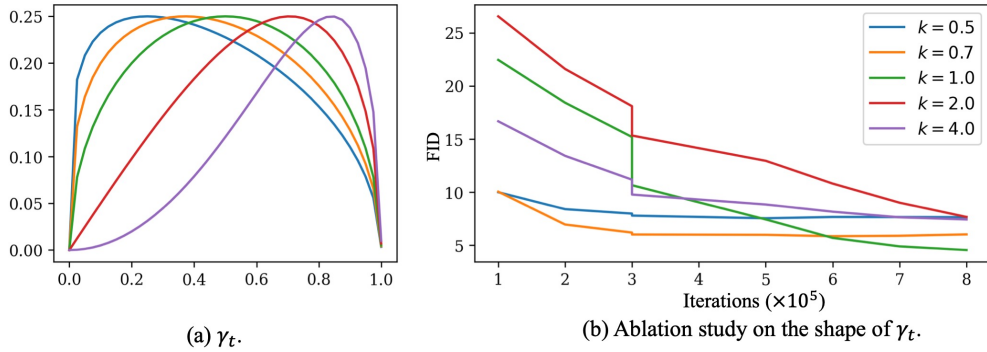

1164  
1165  
1166  
1167  
1168  
1169  
1170  
1171  
1172  
1173  
1174  
1175  
1176  
1177  
1178  
1179  
1180  
1181  
1182  
1183  
1184  
1185  
1186  
1187

Figure 8: Ablation study on the shape of  $\gamma_t$ .

$$\mathbf{x}_{t-\Delta t} = (\alpha_{t-\Delta t} - \alpha_t \frac{\beta_{t-\Delta t}}{\beta_t}) \hat{\mathbf{x}}_0 + \frac{\beta_{t-\Delta t}}{\beta_t} \mathbf{x}_t + \sqrt{\gamma_{t-\Delta t}^2 - \frac{\beta_{t-\Delta t}^2 \gamma_t^2}{\beta_t^2}} \bar{\mathbf{z}}_t \quad (88)$$

$$= (1 - \frac{\beta_{t-\Delta t}}{\beta_t}) \hat{\mathbf{x}}_0 + \frac{\beta_{t-\Delta t}}{\beta_t} \mathbf{x}_t + \sqrt{\gamma_{t-\Delta t}^2 - \frac{\beta_{t-\Delta t}^2 \gamma_t^2}{\beta_t^2}} \bar{\mathbf{z}}_t \quad (89)$$

$$= (1 - \frac{\sigma_{t-\Delta t}^2}{\sigma_t^2}) \hat{\mathbf{x}}_0 + \frac{\sigma_{t-\Delta t}^2}{\sigma_t^2} \mathbf{x}_t + \sqrt{\frac{\sigma_{t-\Delta t}^2 (1 - \frac{\sigma_{t-\Delta t}^2}{\sigma_1^2}) \sigma_1^4 - \frac{\sigma_{t-\Delta t}^4}{\sigma_1^4} \sigma_t^2 (1 - \frac{\sigma_t^2}{\sigma_1^2})}{\frac{\sigma_t^4}{\sigma_1^4}}} \bar{\mathbf{z}}_t \quad (90)$$

$$= (1 - \frac{\sigma_{t-\Delta t}^2}{\sigma_t^2}) \hat{\mathbf{x}}_0 + \frac{\sigma_{t-\Delta t}^2}{\sigma_t^2} \mathbf{x}_t + \sqrt{\frac{\sigma_{t-\Delta t}^2 (\sigma_t^2 - \sigma_{t-\Delta t}^2)}{\sigma_t^2}} \bar{\mathbf{z}}_t \quad (91)$$

In the I2SB paper, define  $a_n^2 := \int_{t_n}^{t_{n+1}} \beta_\tau d\tau$ ,  $\sigma_n^2 := \int_0^{t_n} \beta_\tau d\tau$ . Therefore,

$$\mathbf{x}_n = \frac{a_n^2}{a_n^2 + \sigma_n^2} \hat{\mathbf{x}}_0 + \frac{\sigma_n^2}{a_n^2 + \sigma_n^2} \mathbf{x}_{n+1} + \sqrt{\frac{\sigma_n^2 a_n^2}{\alpha_n^2 + \sigma_n^2}} \bar{\mathbf{z}}_t \quad (92)$$

Thus, we reproduce the sampler of I2SB.

## D ADDITIONAL DESIGN GUIDELINE

**Score reparameterization.** We compared the training stability with and without score reparameterization using the DIODE ( $64 \times 64$ ) dataset, and the results are shown in Fig. 7. For training without

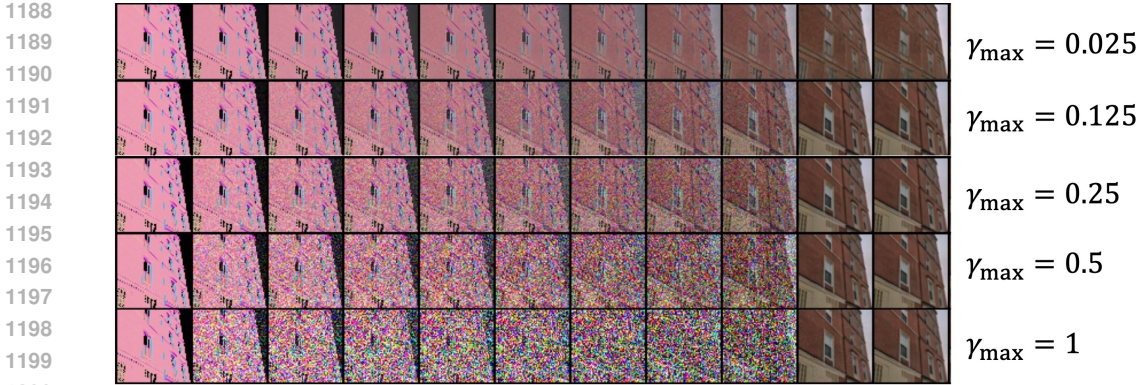

Figure 9: Sampling paths with different choices of  $\gamma_t$ . As  $\gamma_t$  extremely low, e.g,  $\gamma_{\max} = 0.025$ , the model will be failed to construct details of images.

score reparameterization, the score function  $s_\theta(\mathbf{x}, \mathbf{x}_T, t)$  is parameterized by a neural network, and  $\hat{\mathbf{x}}_0(\mathbf{x}, \mathbf{x}_T, t)$  is computed as:  $\hat{\mathbf{x}}_0(\mathbf{x}, \mathbf{x}_T, t) = \frac{1}{\alpha_t} (\gamma_t^2 s_\theta(\mathbf{x}, \mathbf{x}_T, t) + \mathbf{x}_t - \beta \mathbf{x}_T)$ . For training with score reparameterization,  $\hat{\mathbf{x}}_0(\mathbf{x}, \mathbf{x}_T, t)$  is directly parameterized as a neural network. We then compared the mean squared error (MSE) between  $\hat{\mathbf{x}}_0$  and  $\mathbf{x}_0$  during training. The results in Fig. 7 indicate that score reparameterization helps reduce training instability.

$\alpha_t$  and  $\beta_t$ . Theoretically,  $\alpha_t$  and  $\beta_t$  can be freely designed, and future work may explore alternative design choices. However, in this paper, we focus on the simple case where  $\alpha_t = 1 - t$  and  $\beta_t = t$ . The rationale is as follows: consider the scenario where  $\alpha_t = 1 - \beta_t$ , which represents an interpolation along the line segment between  $x_0$  and  $x_1$ . For the path  $p_t^{(1)}(x) = \mathcal{N}((1 - \beta_t)x_0 + \beta_t x_1, \gamma_t^2 \mathbf{I})$ , where  $\beta_t$  is invertible, it is straightforward to construct another path  $p_t^{(2)}(x) = \mathcal{N}((1 - t)x_0 + t x_1, \gamma_{\beta_t^{-1}}^2 \mathbf{I})$ , which achieves the same objective function but uses a different distribution of  $t$  during training. Based on this equivalence, setting  $\alpha_t = 1 - t$  and  $\beta_t = t$  is a reasonable choice.

**The shape of  $\gamma_t$ .** We conducted an ablation study on  $\gamma_t$  with different shapes. Specifically, we assumed  $\gamma_t$  has the form  $\gamma_t = 2\gamma_{\max} \sqrt{t^k(1 - t^k)}$ , as shown in Fig. 8,  $\gamma_t$  will have different shape as we set different  $k$ . The results indicate that the best performance is achieved when  $k = 1$ , which is the exact setting used in this paper.

$\gamma_{\max}$ . Our ablation studies on  $\gamma_{\max}$  demonstrate that the optimal values of  $\gamma_{\max}$  are approximately 0.125 or 0.25. Furthermore, the sampling paths corresponding to different choices of  $\gamma_t$  are shown in Fig. 9. Adding an appropriate amount of noise to the transition kernel helps in constructing finer details.

$\epsilon_t$ . We use the setting  $\epsilon_t = \eta \left( \gamma_t \dot{\gamma}_t - \frac{\dot{\alpha}_t}{\alpha_t} \gamma_t^2 \right)$ . The ablation studies on  $\epsilon_t$  demonstrate that the optimal choice of  $\eta$  for the DDBM-VP model is approximately 0.3, while the best choice for the SDB model with a Linear Path is around 1.0. Additionally, we present sample paths and generated images under different  $\eta$  settings to illustrate heuristic parameter tuning techniques. The results are shown in Figures 11, 12, and 13. Too small a value of  $\eta$  results in the loss of high-frequency information, while too large a value of  $\eta$  produces over-sharpened and potentially noisy sampled images.

## E EXPERIMENT DETAILS

**Architecture.** We maintain the architecture and parameter settings consistent with (Linqi Zhou et al., 2023), utilizing the ADM model (Dhariwal & Nichol, 2021) for  $64 \times 64$  resolution, modifying the channel dimensions from 192 to 256 and reducing the number of residual blocks from three to two. Apart from these changes, all other settings remain identical to those used for  $64 \times 64$  resolution.

1242  
 1243  
 1244  
 1245  
 1246  
 1247  
 1248  
 1249  
 1250  
 1251  
 1252  
 1253  
 1254  
 1255  
 1256  
 1257  
 1258  
 1259  
 1260  
 1261  
 1262  
 1263  
 1264  
 1265  
 1266  
 1267  
 1268  
 1269  
 1270  
 1271  
 1272  
 1273  
 1274  
 1275  
 1276  
 1277  
 1278  
 1279  
 1280  
 1281  
 1282  
 1283  
 1284  
 1285  
 1286  
 1287  
 1288  
 1289  
 1290  
 1291  
 1292  
 1293  
 1294  
 1295

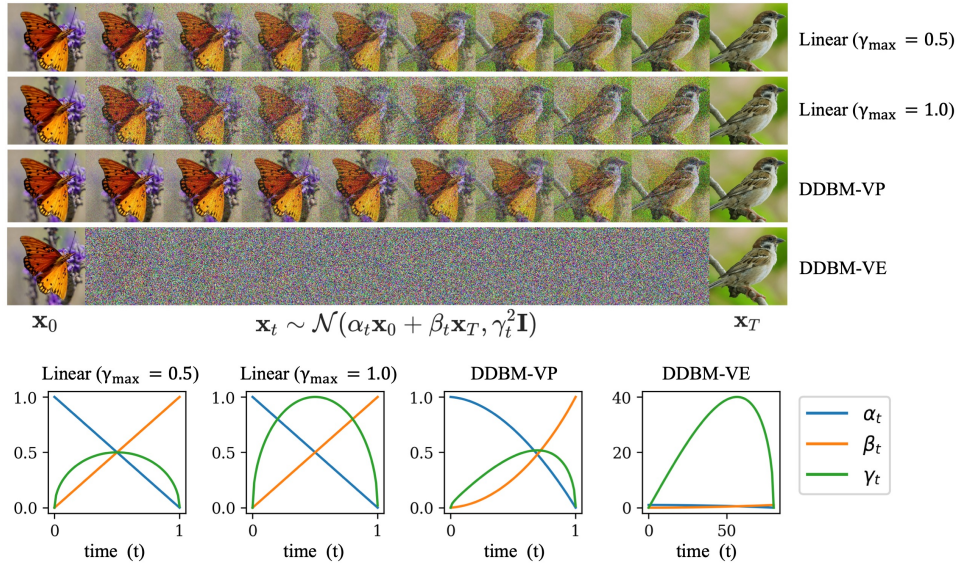

Figure 10: An illustration of design choices of transition kernels and how they affect the I2I translation process.  $\alpha_t$  and  $\beta_t$  define the interpolation between two images, while  $\gamma_t$  controls the noise added to the process. Intuitively, the DDBM-VE model introduces excessive noise in the middle stages, which is unnecessary for effective image translation and may explain its poor performance. In contrast, our Linear path results in a symmetrical noise schedule, ensuring a more balanced process. On the other hand, the DDBM-VP path adds more noise near  $\mathbf{x}_T$ , indicating that during training, more computational resources are focused around  $\mathbf{x}_0$ .

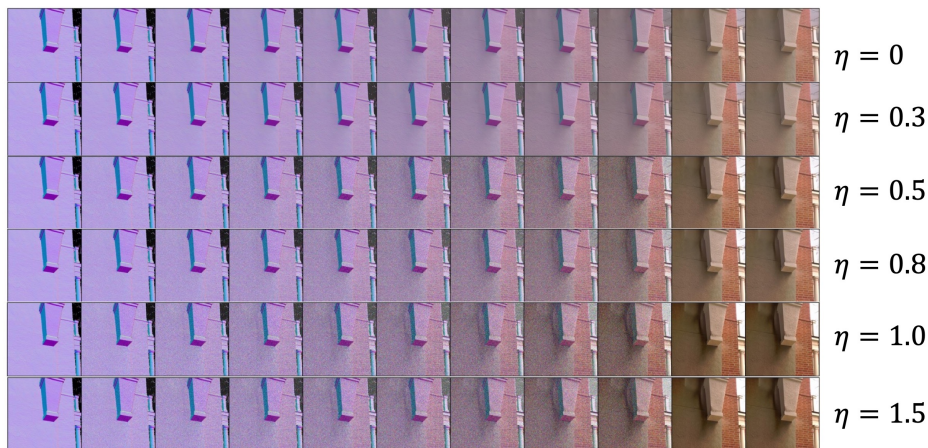

Figure 11: Sampling path with different choices of  $\epsilon_t$ . As  $\epsilon_t = 0$ , the generated images lack details, as  $\epsilon_t$  too large, the sampled images are over-sharpening. The best choices of  $\epsilon_t$  are around  $\epsilon_t = 0.8$  and  $\epsilon_t = 1.0$ .

**Training.** We include additional pre- and post-processing steps: scaling functions and loss weighting, the same ingredient as (Karras et al., 2022). Let  $D_\theta(\mathbf{x}_t, \mathbf{x}_T, t) = c_{\text{skip}}(t)\mathbf{x}_t + c_{\text{out}}(t)F_\theta(c_{\text{in}}(t)\mathbf{x}_t, c_{\text{noise}}(t))$ , where  $F_\theta$  is a neural network with parameter  $\theta$ , the effective training target with respect to the raw network  $F_\theta$  is:  $\mathbb{E}_{\mathbf{x}_t, \mathbf{x}_0, \mathbf{x}_T, t} [\lambda \|c_{\text{skip}}(\mathbf{x}_t + c_{\text{out}}F_\theta(c_{\text{in}}\mathbf{x}_t, c_{\text{noise}}) - \mathbf{x}_0\|^2]$ . Scaling scheme are chosen by requiring network inputs and training targets to have unit variance ( $c_{\text{in}}, c_{\text{out}}$ ), and amplifying errors in  $F_\theta$  as little as possible. Following reasoning in (Linqi Zhou et al., 2023),

$$c_{\text{in}}(t) = \frac{1}{\sqrt{\alpha_t^2 \sigma_0^2 + \beta_t^2 \sigma_T^2 + 2\alpha_t \beta_t \sigma_{0T} + \gamma_t^2}}, \quad c_{\text{skip}}(t) = (\alpha_t \sigma_0^2 + \beta_t \sigma_{0T}) * c_{\text{in}}^2, \quad (93)$$

$$c_{\text{out}}(t) = \sqrt{\beta_t^2 \sigma_0^2 \sigma_1^2 - \beta_t^2 \sigma_{0T}^2 + \gamma_t^2 \sigma_0^2 c_{\text{in}}}, \quad \lambda = \frac{1}{c_{\text{out}}^2}, \quad c_{\text{noise}}(t) = \frac{1}{4} \log(t), \quad (94)$$

where  $\sigma_0^2, \sigma_T^2$ , and  $\sigma_{0T}$  denote the variance of  $\mathbf{x}_0$ , variance of  $\mathbf{x}_T$  and the covariance of the two, respectively.

We note that TrigFlow (Lu & Song, 2024), a contemporaneous work, adopts the same score reparameterization and pre-conditioning techniques. It can be considered a special case of our framework by setting  $\alpha_t = \cos(t), \beta_t = 0, \gamma_t = \sigma_0 \sin(t), t \in [0, \frac{\pi}{2}]$ . In this case,  $\sigma_T = 0, \sigma_{0T} = 0$ ,

$$c_{\text{in}}(t) = \frac{1}{\sqrt{\alpha_t^2 \sigma_0^2 + \gamma_t^2}} = \frac{1}{\sqrt{\sin^2(t)\sigma_0^2 + \cos^2(t)\sigma_0^2}} = \frac{1}{\sigma_0}, \quad (95)$$

$$c_{\text{skip}}(t) = (\alpha_t \sigma_0^2) c_{\text{in}}^2 = \cos(t) \cdot \sigma_0^2 \cdot \frac{1}{\sigma_0^2} = \cos(t), \quad (96)$$

$$c_{\text{out}}(t) = \sqrt{\gamma_t^2 \sigma_0^2} \cdot c_{\text{in}} = \sin(t) \sigma_0, \quad (97)$$

$$D_\theta(x_t, t) = c_{\text{skip}} x_t + c_{\text{out}} F_\theta(c_{\text{in}} x_t, c_{\text{noise}}) = \cos(t) x_t + \sin(t) \sigma_0 F_\theta\left(\frac{1}{\sigma_0}, c_{\text{noise}}\right). \quad (98)$$

Then we recover TrigFlow.

In our implementation, we set  $\sigma_0 = \sigma_T = 0.5, \sigma_{0T} = \sigma_0^2/2$  for all training sessions. Other setting are shown in Table 7.

Table 7: Training settings

|         |                       |                    |                    |                    |
|---------|-----------------------|--------------------|--------------------|--------------------|
|         | Dataset               | edges→handbags     | edges→handbags     | edges→handbags     |
| Model   | $\eta$                | 0                  | 0                  | 0.5                |
|         | $\gamma_{\text{max}}$ | 0.125              | 0.25               | 0.125              |
|         | GPU                   | 1 A6000 48G        | 1 H100 96G         | 1 H100 96G         |
|         | Batch size            | 32                 | 128                | 200                |
| Setting | Learning rate         | $1 \times 10^{-5}$ | $5 \times 10^{-5}$ | $1 \times 10^{-4}$ |
|         | epochs                | 2078               | 2106               | 1443               |
|         | Training time         | 42 days            | 8 days             | 11 days            |
|         | Dataset               | DIODE (256 × 256)  | DOIDE (256 × 256)  |                    |
| Model   | $\eta$                | 0                  | 0                  |                    |
|         | $\gamma_{\text{max}}$ | 0.125              | 0.25               |                    |
|         | GPU                   | 1 H100 96G         | 1 H100 96G         |                    |
|         | Batch size            | 16                 | 16                 |                    |
| Setting | Learning rate         | $2 \times 10^{-5}$ | $2 \times 10^{-5}$ |                    |
|         | epochs                | 2617               | 1745               |                    |
|         | Training time         | 17 days            | 25 days            |                    |

**Sampling.** We use the same timesteps distributed according to EDM (Karras et al., 2022):  $(t_{\text{max}}^{1/\rho} + \frac{i}{N}(t_{\text{min}}^{1/\rho} - t_{\text{max}}^{1/\rho}))^\rho$ , where  $t_{\text{min}} = 0.001$  and  $t_{\text{max}} = 1 - 10^{-4}$ . The best performance achieved by setting  $\rho = 0.6$  for Edges2handbags and  $\rho = 0.8$  for DIODE datasets.

1350  
1351  
1352  
1353  
1354  
1355  
1356  
1357  
1358  
1359  
1360  
1361  
1362  
1363  
1364  
1365  
1366  
1367  
1368  
1369  
1370  
1371  
1372  
1373  
1374  
1375  
1376  
1377  
1378  
1379  
1380  
1381  
1382  
1383  
1384  
1385  
1386  
1387  
1388  
1389  
1390  
1391  
1392  
1393  
1394  
1395  
1396  
1397  
1398  
1399  
1400  
1401  
1402  
1403

## Licenses

- Edges→Handbags Isola et al. (2017): BSD license.
- DIODE-Outdoor Vasiljevic et al. (2019): MIT license.

1404  
 1405  
 1406  
 1407  
 1408  
 1409  
 1410  
 1411  
 1412  
 1413  
 1414  
 1415  
 1416  
 1417  
 1418  
 1419  
 1420  
 1421  
 1422  
 1423  
 1424  
 1425  
 1426  
 1427  
 1428  
 1429  
 1430  
 1431  
 1432  
 1433  
 1434  
 1435  
 1436  
 1437  
 1438  
 1439  
 1440  
 1441  
 1442  
 1443  
 1444  
 1445  
 1446  
 1447  
 1448  
 1449  
 1450  
 1451  
 1452  
 1453  
 1454  
 1455  
 1456  
 1457

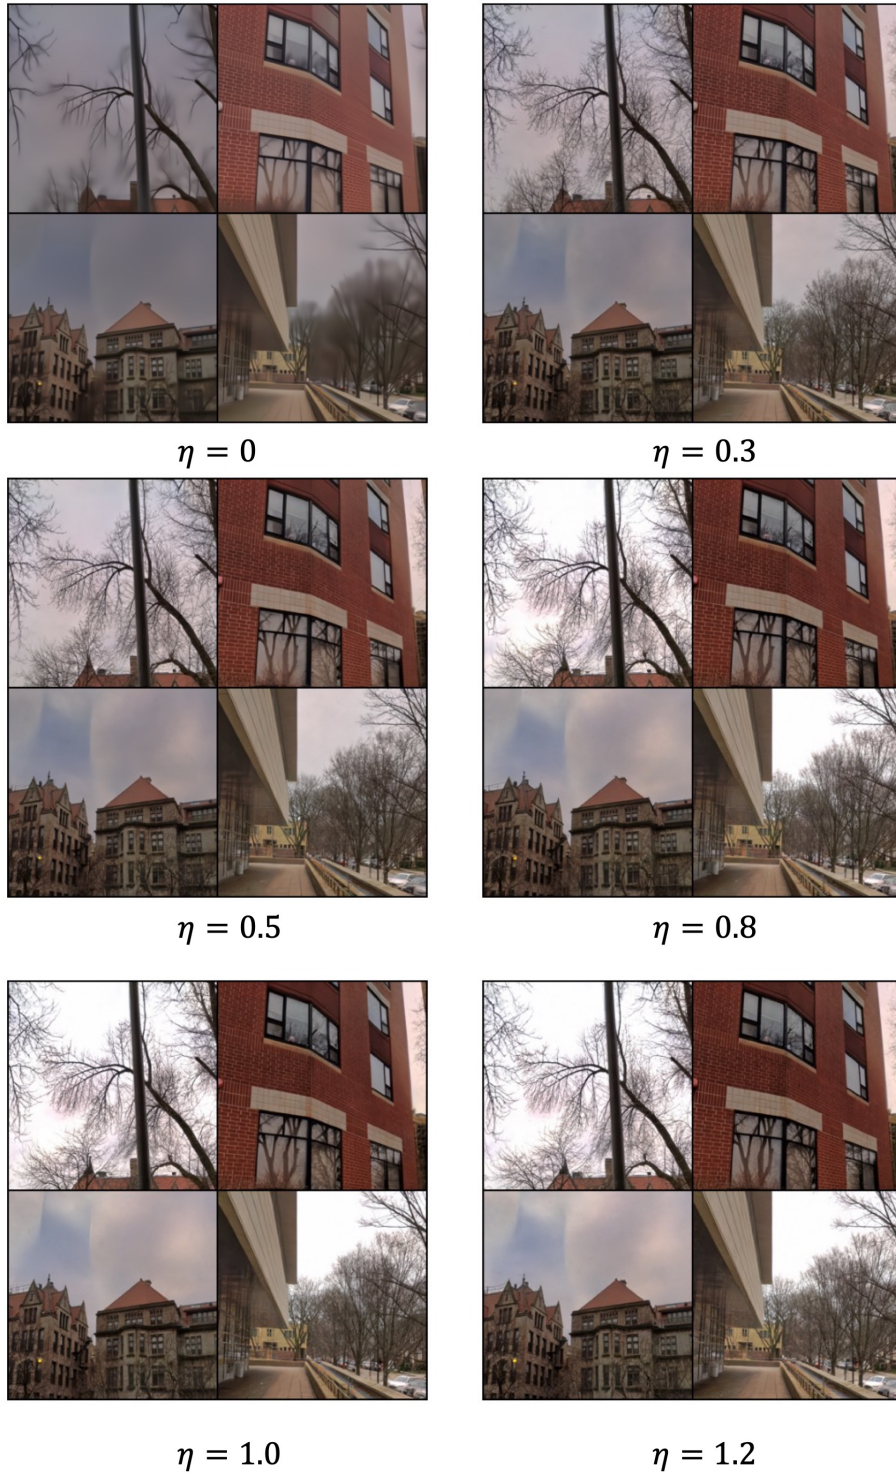

Figure 12: Comparison of sampled images with different  $\epsilon_t$  for SDB model, where  $\epsilon_t = \eta(\gamma_t \hat{\gamma}_t - \frac{\hat{\alpha}_t}{\alpha_t} \gamma_t^2)$ ,  $\gamma_{\max} = 0.25$ ,  $b = 0$ .

1458  
 1459  
 1460  
 1461  
 1462  
 1463  
 1464  
 1465  
 1466  
 1467  
 1468  
 1469  
 1470  
 1471  
 1472  
 1473  
 1474  
 1475  
 1476  
 1477  
 1478  
 1479  
 1480  
 1481  
 1482  
 1483  
 1484  
 1485  
 1486  
 1487  
 1488  
 1489  
 1490  
 1491  
 1492  
 1493  
 1494  
 1495  
 1496  
 1497  
 1498  
 1499  
 1500  
 1501  
 1502  
 1503  
 1504  
 1505  
 1506  
 1507  
 1508  
 1509  
 1510  
 1511

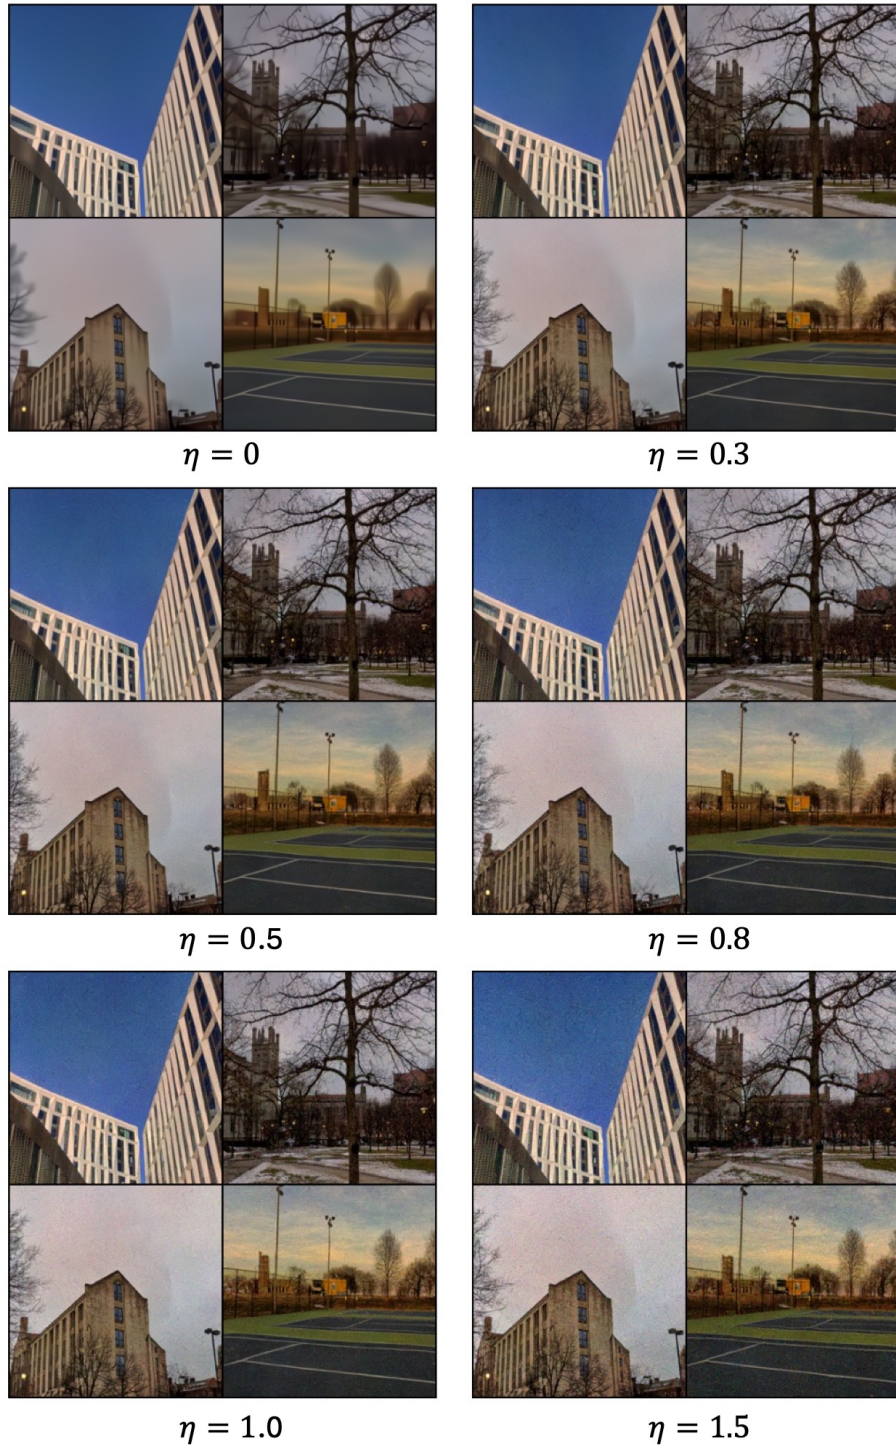

Figure 13: Comparison of sampled images with different  $\epsilon_t$  for DDBM-VP pretrained model, where  $\epsilon_t = \eta(\gamma_t \hat{\gamma}_t - \frac{\alpha_t}{\alpha_t} \gamma_t^2)$ .

1512  
1513  
1514  
1515  
1516  
1517  
1518  
1519  
1520  
1521  
1522  
1523  
1524  
1525  
1526  
1527  
1528  
1529  
1530  
1531  
1532  
1533  
1534  
1535  
1536  
1537  
1538  
1539  
1540  
1541  
1542  
1543  
1544  
1545  
1546  
1547  
1548  
1549  
1550  
1551  
1552  
1553  
1554  
1555  
1556  
1557  
1558  
1559  
1560  
1561  
1562  
1563  
1564  
1565

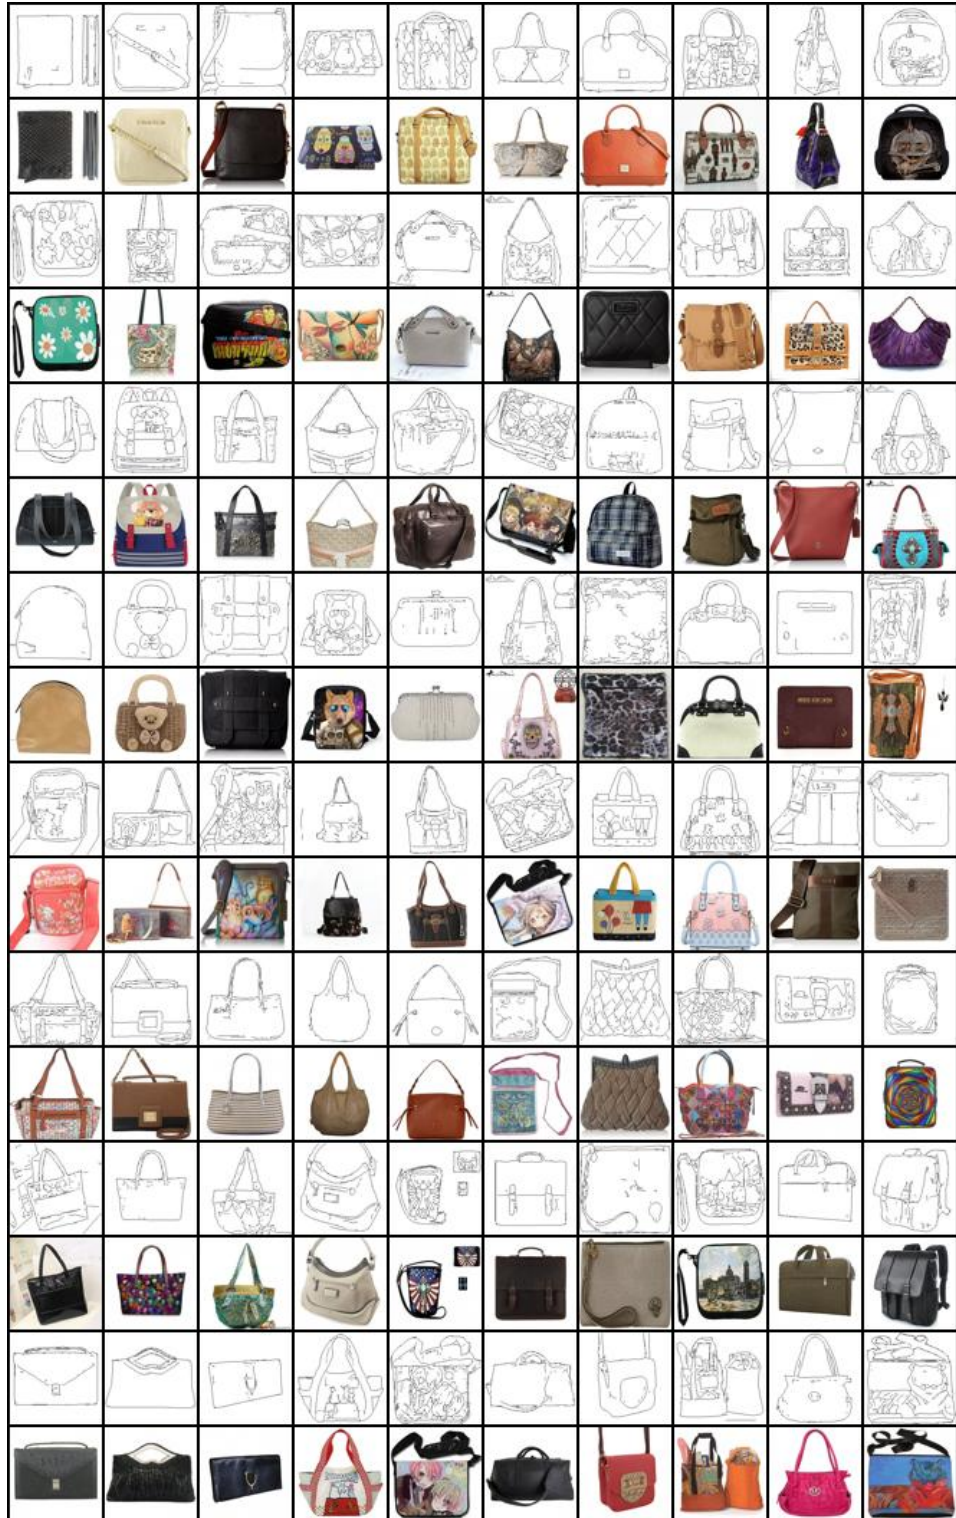

Figure 14: SDB model and sampler ( $\gamma_{\max} = 0.125$ ,  $\eta = 1$ ,  $b = 0$ , NFE=5, FID=0.89).



1566 F ADDITIONAL VISUALIZATIONS  
1567

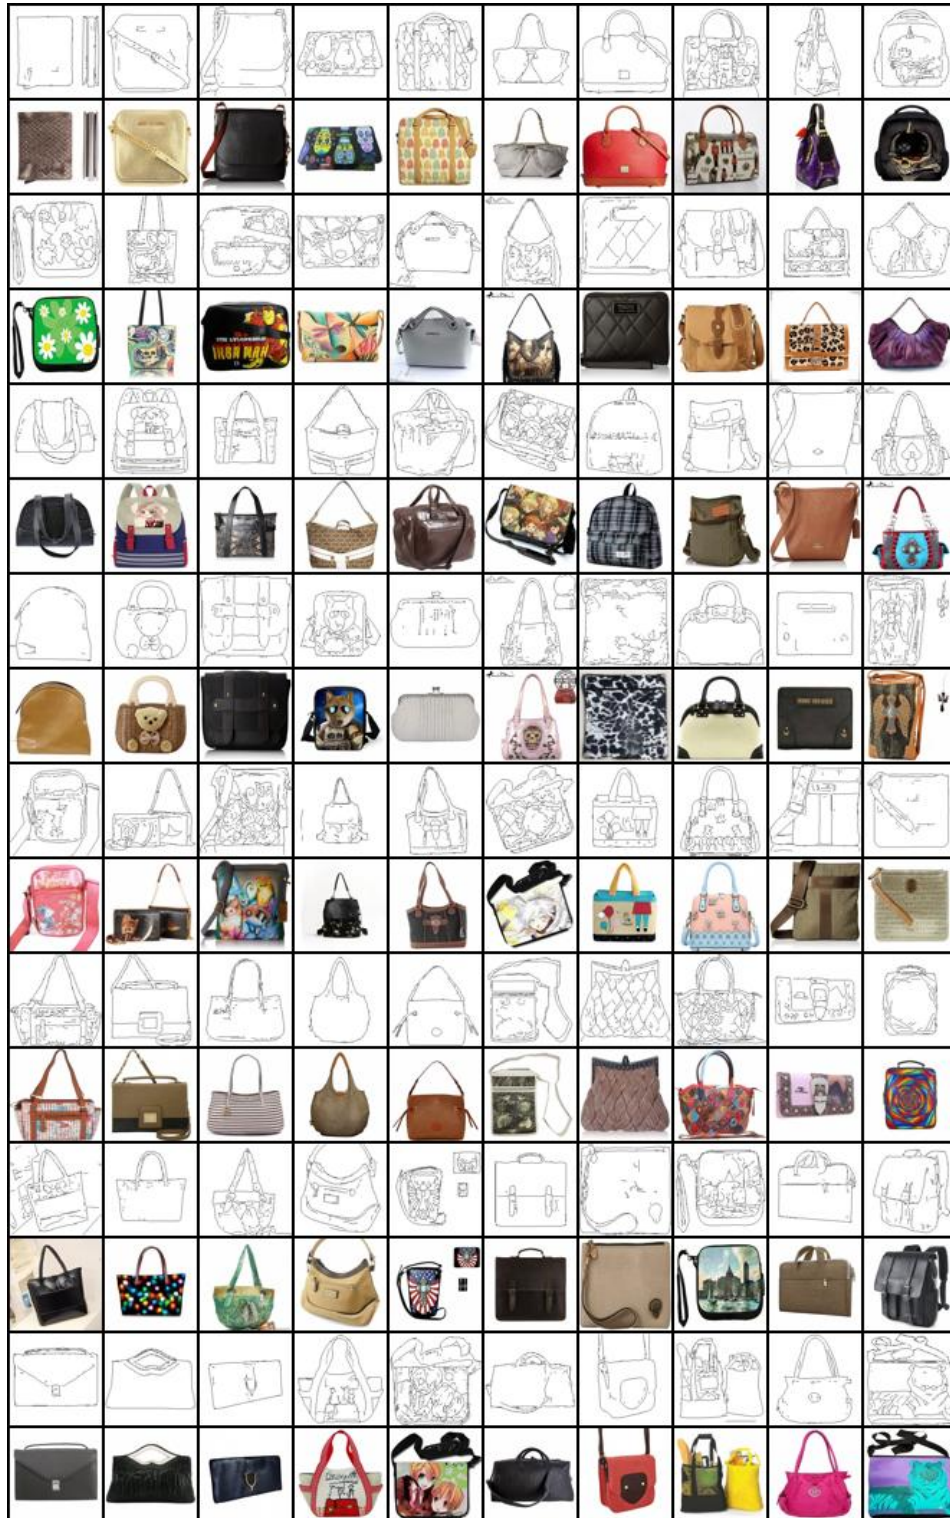

Figure 15: DDBM model and Our sampler (NFE=20, FID=1.53).

1616  
1617  
1618  
1619

1620  
1621  
1622  
1623  
1624  
1625  
1626  
1627  
1628  
1629  
1630  
1631  
1632  
1633  
1634  
1635  
1636  
1637  
1638  
1639  
1640  
1641  
1642  
1643  
1644  
1645  
1646  
1647  
1648  
1649  
1650  
1651  
1652  
1653  
1654  
1655  
1656  
1657  
1658  
1659  
1660  
1661  
1662  
1663  
1664  
1665  
1666  
1667  
1668  
1669  
1670  
1671  
1672  
1673

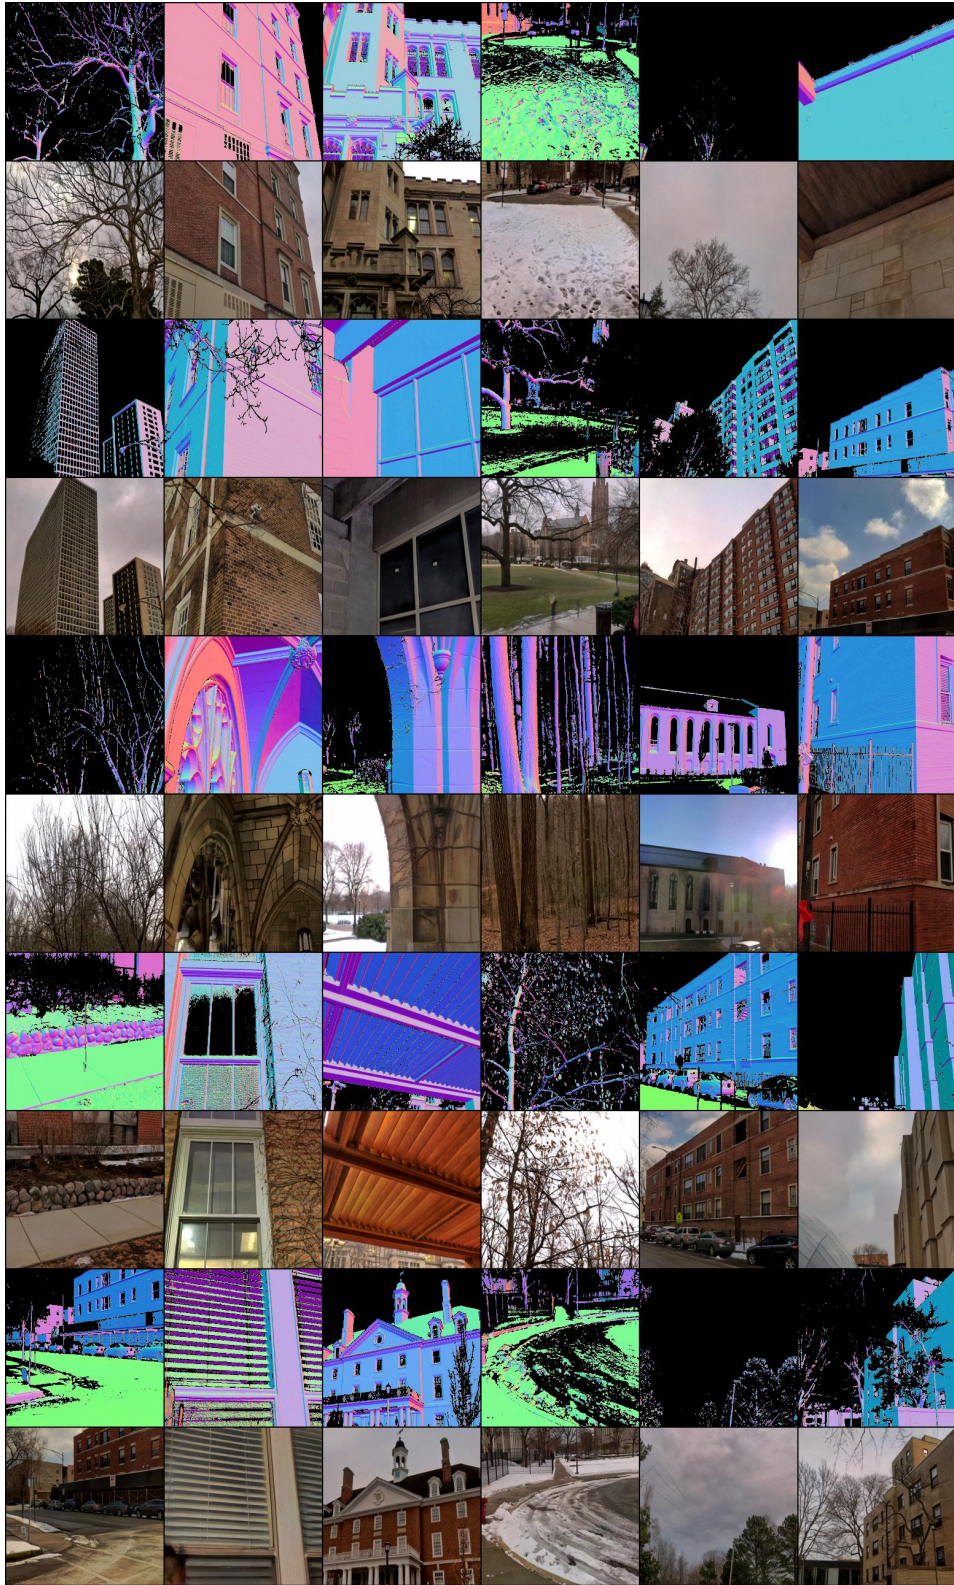

Figure 16: DDBM model and SDB sampler ( $\eta = 0.3$ , NFE=20, FID=4.12). Samples for DIODE dataset (conditioned on depth images).

1674  
1675  
1676  
1677  
1678  
1679  
1680  
1681  
1682  
1683  
1684  
1685  
1686  
1687  
1688  
1689  
1690  
1691  
1692  
1693  
1694  
1695  
1696  
1697  
1698  
1699  
1700  
1701  
1702  
1703  
1704  
1705  
1706  
1707  
1708  
1709  
1710  
1711  
1712  
1713  
1714  
1715  
1716  
1717  
1718  
1719  
1720  
1721  
1722  
1723  
1724  
1725  
1726  
1727

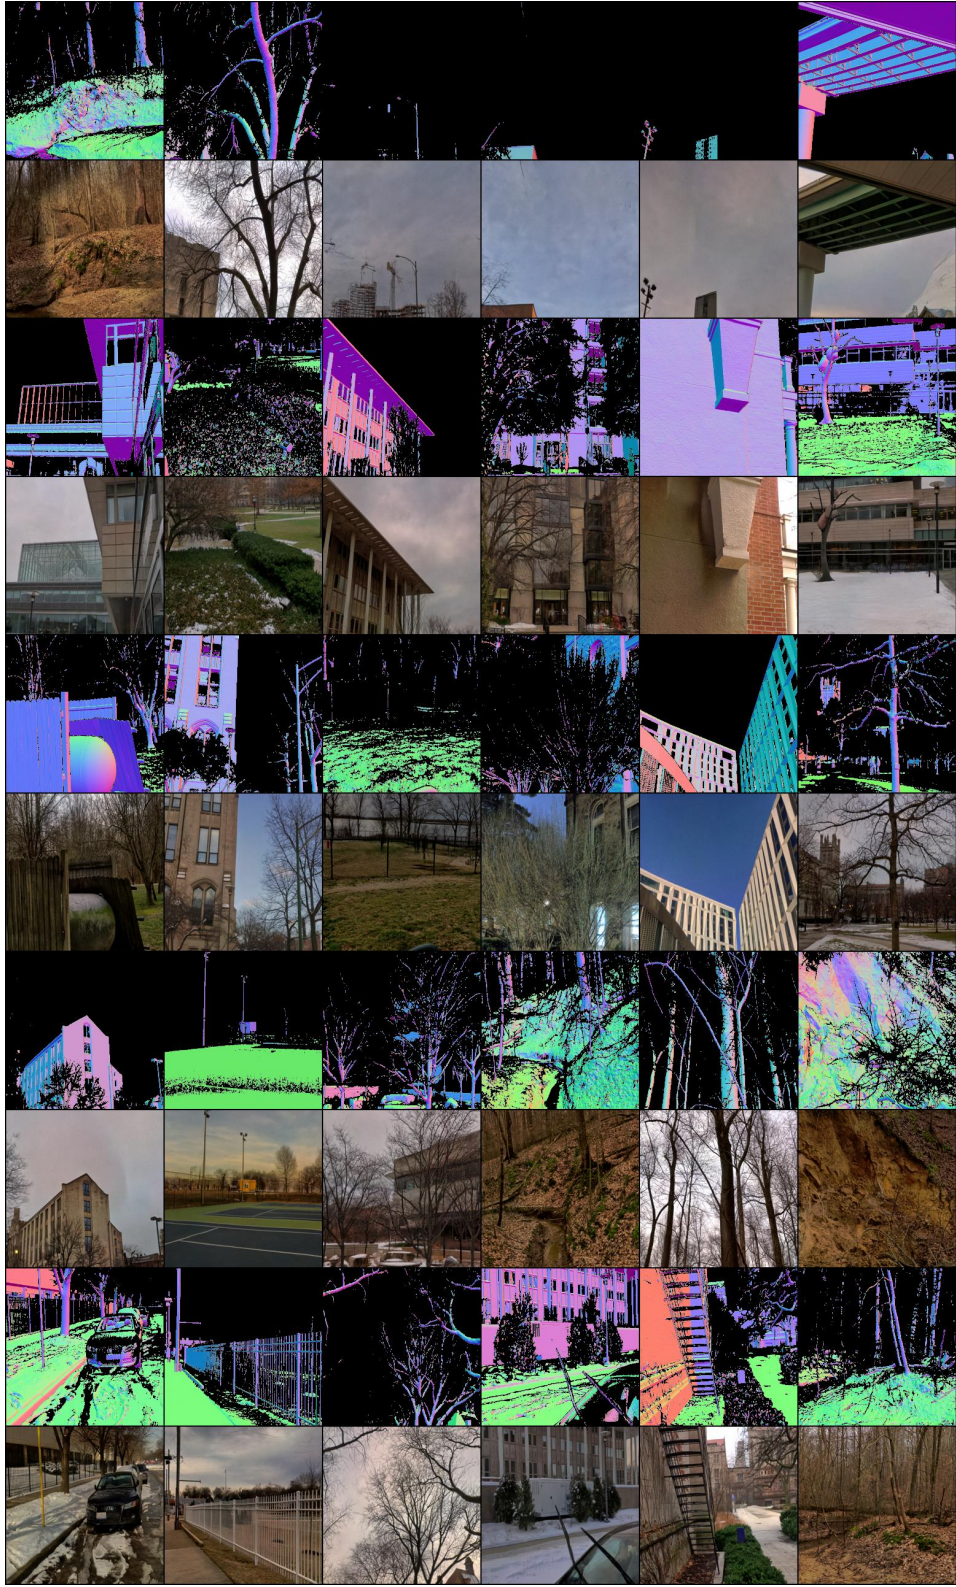

Figure 17: SDB model and sampler ( $\gamma_{\max} = 0.25$ ,  $\eta = 1.0$ ,  $b = 0$ , NFE=5, FID = 4.16).

1728  
1729  
1730  
1731  
1732  
1733  
1734  
1735  
1736  
1737  
1738  
1739  
1740  
1741  
1742  
1743  
1744  
1745  
1746  
1747  
1748  
1749  
1750  
1751  
1752  
1753  
1754  
1755  
1756  
1757  
1758  
1759  
1760  
1761  
1762  
1763  
1764  
1765  
1766  
1767  
1768  
1769  
1770  
1771  
1772  
1773  
1774  
1775  
1776  
1777  
1778  
1779  
1780  
1781

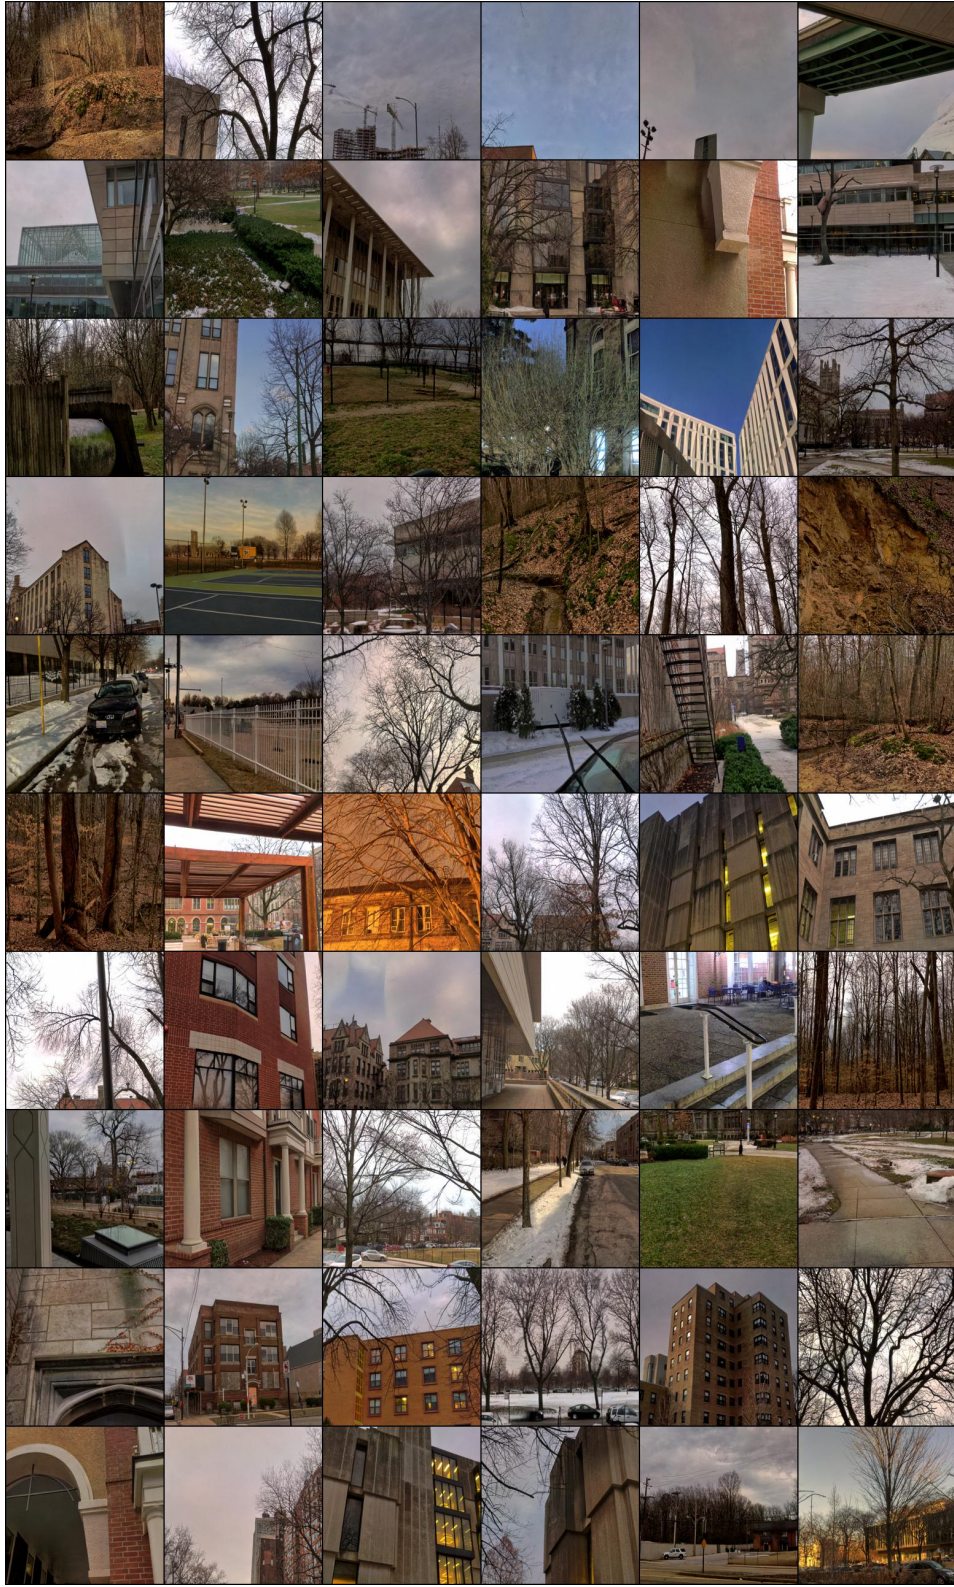

Figure 18: SDB model and sampler ( $\gamma_{\max} = 0.25$ ,  $\eta = 1.0$ ,  $b = 0$ , NFE=20, FID = 3.27).

1782  
1783  
1784  
1785  
1786  
1787  
1788  
1789  
1790  
1791  
1792  
1793  
1794  
1795  
1796  
1797  
1798  
1799  
1800  
1801  
1802  
1803  
1804  
1805  
1806  
1807  
1808  
1809  
1810  
1811  
1812  
1813  
1814  
1815  
1816  
1817  
1818  
1819  
1820  
1821  
1822  
1823  
1824  
1825  
1826  
1827  
1828  
1829  
1830  
1831  
1832  
1833  
1834  
1835

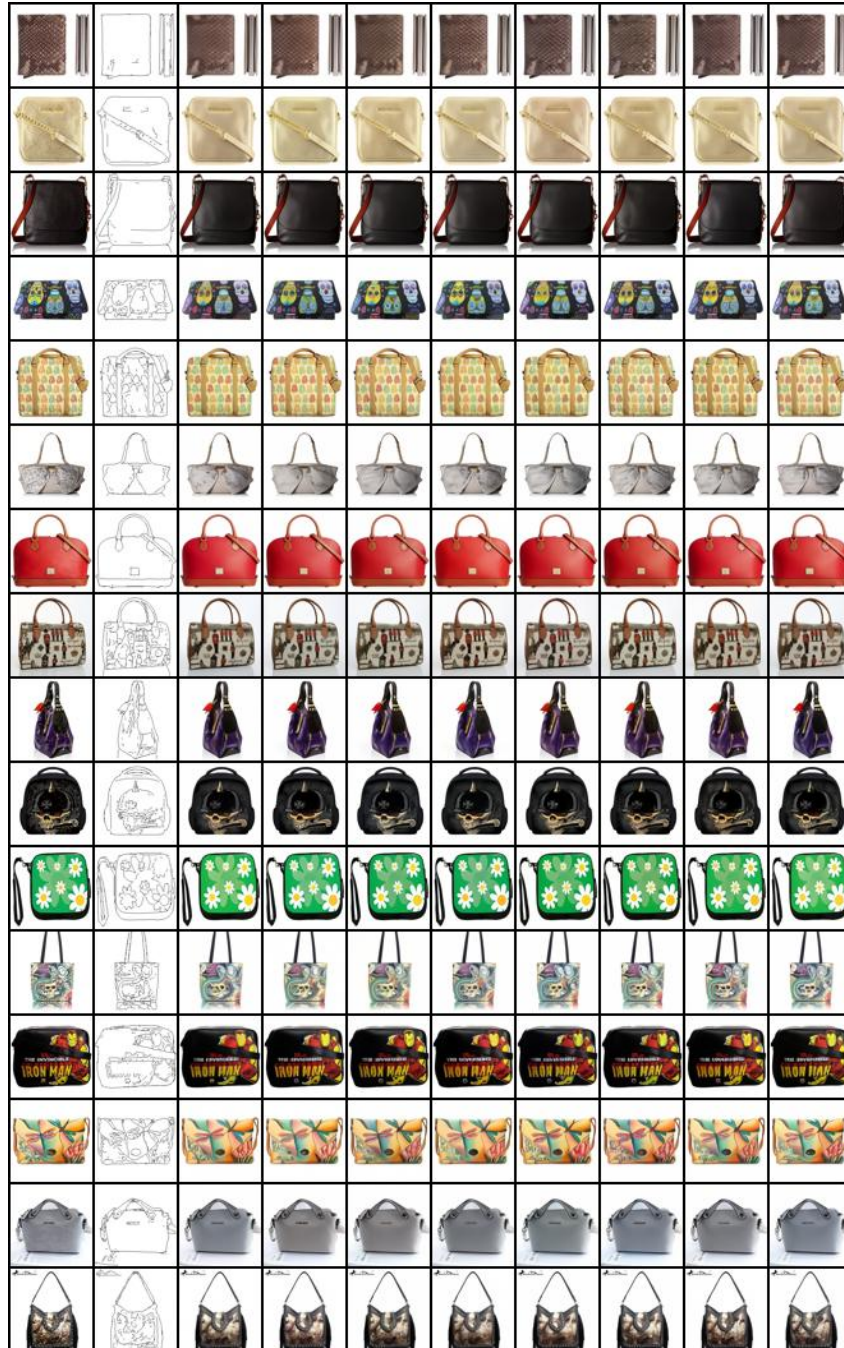

Figure 19: **DDBM** model and **DBIM** sampler (NFE=10, FID = 2.46, AFD=5.20).

1836  
1837  
1838  
1839  
1840  
1841  
1842  
1843  
1844  
1845  
1846  
1847  
1848  
1849  
1850  
1851  
1852  
1853  
1854  
1855  
1856  
1857  
1858  
1859  
1860  
1861  
1862  
1863  
1864  
1865  
1866  
1867  
1868  
1869  
1870  
1871  
1872  
1873  
1874  
1875  
1876  
1877  
1878  
1879  
1880  
1881  
1882  
1883  
1884  
1885  
1886  
1887  
1888  
1889

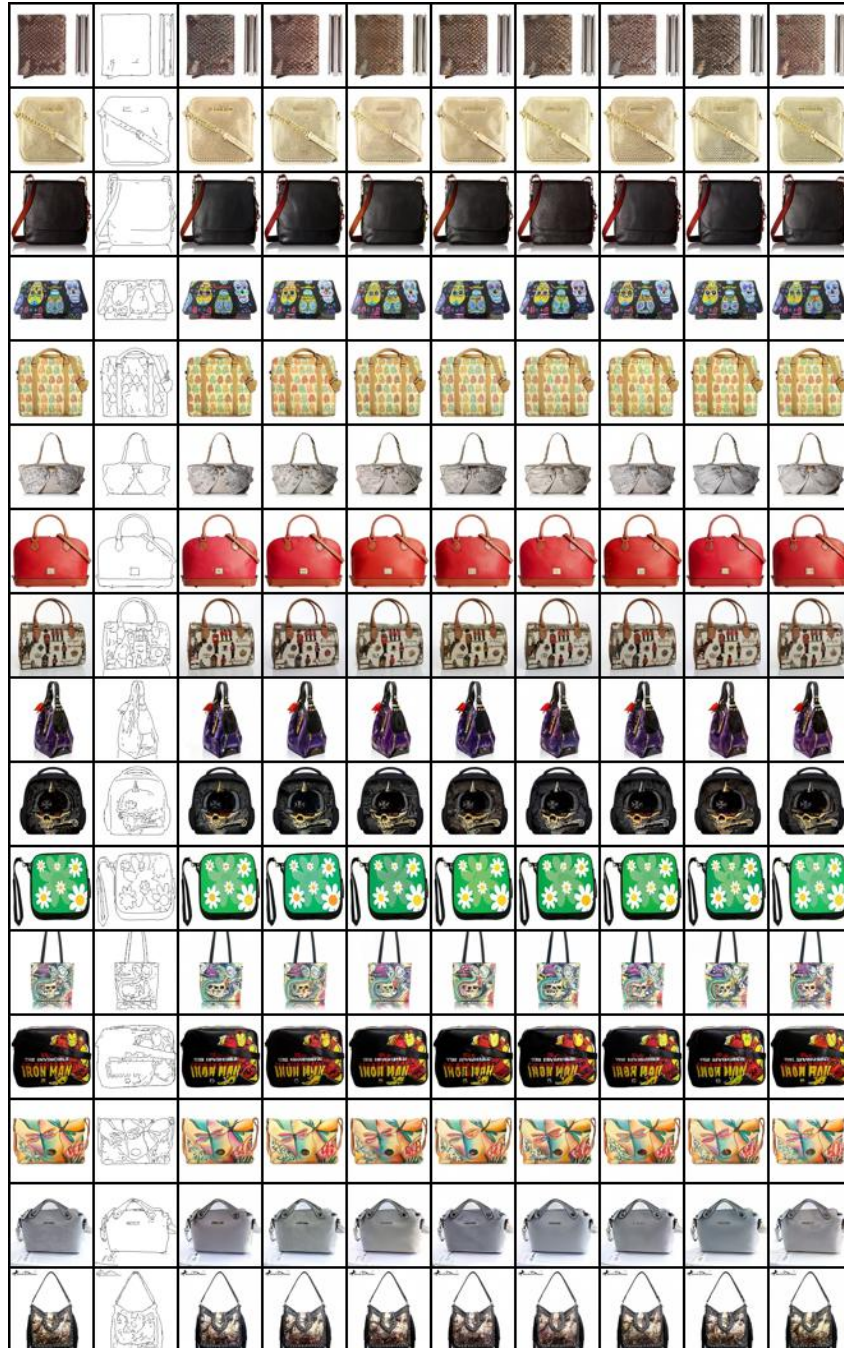

Figure 20: DDBM model and sampler (NFE=118, FID = 1.83, AFD=6.99).

1890  
1891  
1892  
1893  
1894  
1895  
1896  
1897  
1898  
1899  
1900  
1901  
1902  
1903  
1904  
1905  
1906  
1907  
1908  
1909  
1910  
1911  
1912  
1913  
1914  
1915  
1916  
1917  
1918  
1919  
1920  
1921  
1922  
1923  
1924  
1925  
1926  
1927  
1928  
1929  
1930  
1931  
1932  
1933  
1934  
1935  
1936  
1937  
1938  
1939  
1940  
1941  
1942  
1943

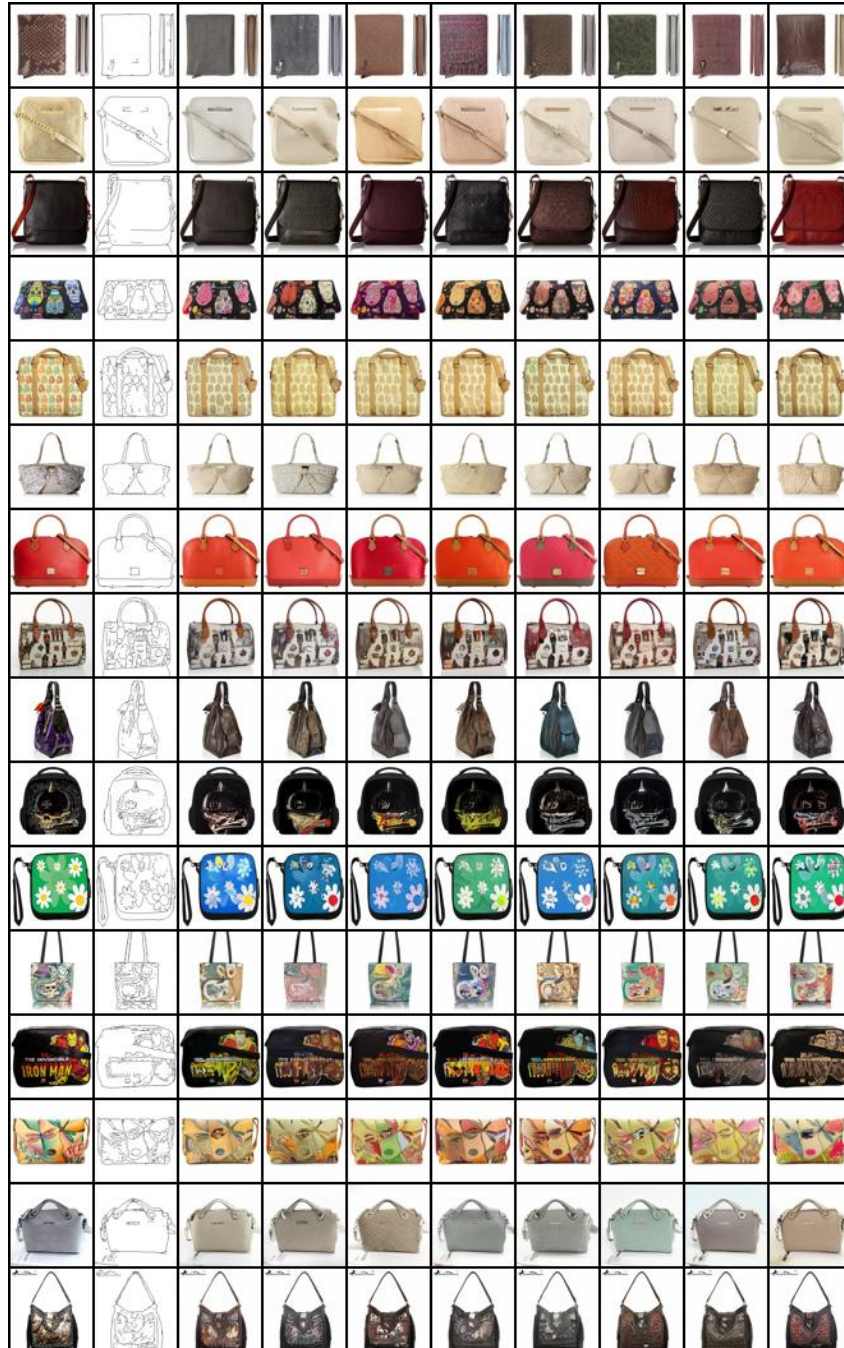

Figure 21: SDB model and sampler ( $\gamma_{\max} = 0.125$ ,  $b = 1.0$ , NFE=10, FID = 2.07, AFD=9.35).
